# New insights into the earlier evolutionary history of epiphytic macrolichens

Qiuxia Yang<sup>1,2#</sup>, Yanyan Wang<sup>1#</sup>, Robert Lücking<sup>3</sup>, H. Thorsten Lumbsch<sup>4</sup>, Xin Wang<sup>5</sup>, Zhenyong Du<sup>6</sup>,  
Yunkang Chen<sup>7,8</sup>, Ming Bai<sup>9</sup>, Dong Ren<sup>10</sup>, Jiangchun Wei<sup>1,2</sup>, Hu Li<sup>6†</sup>, Yongjie Wang<sup>10†</sup> and Xinli Wei<sup>1,2†</sup>

<sup>1</sup>State Key Laboratory of Mycology, Institute of Microbiology, Chinese Academy of Sciences, Beijing  
100101, China.

<sup>2</sup>College of Life Sciences, University of Chinese Academy of Sciences, Beijing 100049, China.

<sup>3</sup>Botanischer Garten und Botanisches Museum, Freie Universität Berlin, 14195 Berlin, Germany.

<sup>4</sup>Science & Education, The Field Museum, Chicago, IL 60605, USA.

<sup>5</sup>Nanjing Institute of Geology and Palaeontology, Chinese Academy of Sciences, Nanjing 210008,  
China.

<sup>6</sup>Department of Entomology, MOA Key Lab of Pest Monitoring and Green Management, College of  
Plant Protection, China Agricultural University, Beijing 100193, China.

<sup>7</sup>School of Agriculture, Ningxia University, Yinchuan, 750021, PR China

<sup>8</sup>College of Plant Protection, Agricultural University of Hebei, Baoding, 071001, PR China

<sup>9</sup>Key Laboratory of Zoological Systematics and Evolution, Institute of Zoology, Chinese Academy of  
Sciences, Beijing 100101, China.

<sup>10</sup>College of Life Sciences and Academy for Multidisciplinary Studies, Capital Normal University,  
Beijing 100048, China.

#Co-first author: Contribution equally to this work.

†For correspondence: [tigerleecau@hotmail.com](mailto:tigerleecau@hotmail.com) (H.L.), [wangyjosmy@foxmail.com](mailto:wangyjosmy@foxmail.com) (Y.W.) and  
[weixl@im.ac.cn](mailto:weixl@im.ac.cn) (X.W.).

## Abstract

Lichens are well known as pioneer organisms colonizing bare surfaces such as rocks and therefore have  
been hypothesized to play a role in the early formation of terrestrial ecosystems. Given the rarity of  
fossil evidence, our understanding of the evolutionary history of lichen-forming fungi is primarily  
based on molecular dating approaches. These studies suggest extant clades of macrolichens diversified  
after the K–Pg boundary. Here we corroborate the mid-Mesozoic fossil *Daohugouthallus ciliiferus* as  
an epiphytic macrolichen that predates the K-Pg boundary by 100 Mys. Based on new material and  
geometric morphometric analysis, we demonstrate that the Jurassic fossil is morphologically most

similar to Parmeliaceae, but cannot be placed in Parmeliaceae or other similar family-level clades forming macrolichens as these evolved much later. Consequently, a new family, Daohugouthallaceae, is proposed here to accommodate this fossil, which reveals macrolichens may have been diverse long before the Cenozoic diversification of extant lineages.

## Introduction

Lichens are a stable symbiosis composed of fungi and algae and/or cyanobacteria; they also include a diverse microbiome (*Spridille et al., 2016; Lücking and Nelsen, 2018; Hawksworth and Grube, 2020*). Lichens are components of mostly terrestrial ecosystems from the polar regions to the tropics (*Lumbsch and Rikkinen, 2017*), growing on all kinds of substrates, including bark, rock, leaves and soil (*Belnap et al., 2001; Brodo et al., 2001; Nash, 2008*). Lichens play important roles in ecosystem function, including weathering of rock and accelerating formation of soil (*Lindsay, 1978; Chen et al., 2000*), fixing carbon and nitrogen from the atmosphere (*Wu et al., 2011*), and as food source for animals (including humans, *Cornelissen et al., 2007*). Due to their sensitivity to environmental changes, lichens also are widely used as bioindicator of air pollution and environmental health. The evolutionary history of lichen-forming fungi is poorly understood, due to the sparse fossil record, and has been primarily reconstructed based on molecular dating analyses (*Kraichak et al., 2015, 2018; Lücking et al., 2017; Huang et al., 2019; Widhalm et al., 2019; Nelsen et al., 2020*). Although these approaches proposed a framework to illustrate how the lichen symbiosis may have evolved, the fossil evidence is indispensable in testing and supplementing the current understandings especially when the earlier fossil was discovered.

To date, about 190 fossils are accepted to represent genuine lichens, and a few are considered ambiguous, i.e. potentially representing lichens (*Lücking and Nelsen, 2018*). The earliest accepted

lichen are two crustose lichens from Devonian fossils, i.e. *Cyanolichenomycites devonicus* and *Chlorolichenomycites salopensis* (419–411 Mya), which were inferred to be saxicolous or terricolous (*Lücking and Nelsen, 2018*). The other earlier lichen is from the Lower Cretaceous, i.e. *Honeggeriella complexa* (ca. 133 Mya) that was suggested as a squamulose or foliose lichen, although no larger pieces showing its architecture are preserved (*Matsunaga et al., 2013; Honegger et al., 2013*). A recent study corroborated the lichen property of *Daohugouthallus ciliiferus* from the Middle Jurassic (ca. 165 Mya) that represented the earliest foliose to subfruticose lichen, based on its external morphology (*Fang et al., 2020*). Other than this fossil, lichens with foliose and fruticose thalli, the principle forms of macrolichens, have no unambiguous fossil record before the K–Pg boundary (*Lücking and Nelsen, 2018*), and the oldest accepted macrolichen fossils are from Eocene Baltic amber (38–44 Mya), including foliose and fruticose Parmeliaceae (*Kaasalainen et al., 2015, 2017*). *Ziegler (2001)* described and depicted various fragments of presumed parmelioid macrolichens from the Keuper formation (230–200 Mya), a work that has not received much attention and was overlooked by lichenologists (*Lücking and Nelsen, 2018*). A revision of the data presented in that study did not show conclusive evidence for the presence of macrolichens in the depicted fossils; it also presents methodological issues, such as lack of voucher information and precise links of micrographs to the corresponding fossils. Given this lack of evidence for macrolichen fossils prior to the K–Pg boundary, the question arises about the significance of the Jurassic lichen *Daohugouthallus ciliiferus* for understanding the evolutionary history of macrolichens in the Mesozoic.

Macrolichens evolved independently in various classes of Basidiomycota (Agaricomycetes: e.g., *Cora*) and Ascomycota, such as Arthoniomycetes (e.g., *Rocella*) and Lichinomycetes (e.g., *Thyrea*). However, most macrolichens are found in the largest class of lichenized Ascomycota, the

75 Lecanoromycetes. According to recent molecular clock studies (*Nelsen et al., 2020*), within  
76 Lecanoromycetes, macrolichens evolved independently in at least three separate clades: 1)  
77 Umbilicariaceae (subclass Umbilicariomycetidae), with an inferred stem age of 164–150 Mya; 2)  
78 Icmadophilaceae (subclass Ostropomycetidae), including macrolichens such as *Siphula* and *Thamnolia*,  
79 with an inferred stem age of 214–190 Mya; and 3) subclass Lecanoromycetidae, which contain major  
80 macrolichen clades such as Cladoniaceae, Coccocarpiaceae, Collemataceae, Pannariaceae,  
81 Parmeliaceae, Peltigeraceae, Physciaceae, Ramalinaceae, and Teloschistaceae. Among these,  
82 Collemataceae appears to be the oldest, with a stem age of around 145–140 Mya, followed by  
83 Pannariaceae and Coccocarpiaceae (140–135 Mya), Peltigeraceae (125–120 Mya), Parmeliaceae (80–75  
84 Mya), Physciaceae (80–60 Mya for macrolichen clades), and Cladoniaceae (60–55 Mya),  
85 Teloschistaceae (65–35 Mya for macrolichen clades) and Ramalinaceae (around 50 Mya for  
86 macrolichen clades; *Nelsen et al. 2020*). However, even families that appeared in the Cretaceous, such  
87 as Parmeliaceae and Peltigeraceae, were shown to exhibit significantly increased diversification rates  
88 after the Cretaceous–Paleogene (K–Pg) boundary (66 Mya, *Kraichak et al., 2018*; *Huang et al., 2019*;  
89 *Widhelm et al., 2019*; *Nelsen et al., 2020*).

90 Given that macrolichens have evolved in convergent fashion in multiple, often unrelated lineages in  
91 Asco- and Basidiomycota, it is vital to clarify the position of *Daohugouthallus ciliiferus* in  
92 reconstructing and understanding the evolution of macrolichens. The oldest known macrolichen fossil,  
93 *Daohugouthallus ciliiferus*, cannot be placed with certainty in extant lineages because fine-scaled  
94 diagnostic features, such as hamathecium, ascus, and ascospore structure, cannot be observed.  
95 However, techniques such as automated image recognition have allowed to at least analyze  
96 morphometric features in a way that allow a quantitative approach to hypothesis testing. In the present

study, we therefore provide an updated morphological assessment of *Daohugouthallus ciliiferus*, using an image-based, geometric morphometric analysis to compare the fossil with a range of extant macrolichens. In parallel, we used the large molecular clock analysis by *Nelsen et al. (2020)*, which due to the comprehensive sampling offers a much broader framework than other molecular clock studies including lichen formers (e.g. *James et al., 2006; Lutzoni et al., 2018; Kraichak et al., 2018*), to reassess stem and crown node ages for major clades of macrolichen formers in the Lecanoromycetes, in comparison to the age of the fossil. As a result, we propose a new family, Daohugouthallaceae, for this fossil.

## Results

**Daohugouthallaceae** X.L. Wei, X. Wang, D. Ren & J.C. Wei, fam. nov. (*Fig. 1*)

——Fungal Names FN570853

*Diagnosis:* Thallus corticolous, foliose to subfruticose, lobes irregularly branching, lateral black cilia and lobules present. Fungal hyphae thin, algal cells globose, one celled.

*Type genus:* *Daohugouthallus* Wang, Krings & Taylor (*Wang et al., 2010*)

*Type species:* *Daohugouthallus ciliiferus* Wang, Krings & Taylor (*Wang et al., 2010*)

Thallus foliose to subfruticose, about 5 cm high, 3 cm wide (*Fig. 1A, E, F*); lobes slender, about 5 mm long and 0.5–1.5 mm wide, tips tapering, nearly dichotomous to irregular branching, with lateral rhizinate cilia, concolorous to thallus to black, 0.5–1.5 mm long (*Fig. 1B*); surface yellow-brown with black spots in some area; lobules present (*Fig. 1B*); unknown disc-like structure superficial, or nearly terminal, yellow-brown, 0.25–0.5 mm in diam., sometimes immersed (*Fig. 1C*). Upper cortex conglutinate, comprising one cell layer, very thin, c. 1 µm thick (*Fang et al., 2020*); algal cells globose to near globose, one-celled, mostly 1.5–2.1 µm in diameter, some in framboidal form, anastomosed by

or adhered to the fungal hyphae with simple wall-to-wall mycobiont-photobiont interface; fungal hyphae filamentous, some shriveled, septate, 1.2–1.5  $\mu\text{m}$  wide (*Fig. 1G–J; Fang et al., 2020*).

*Substrate:* An unidentified gymnosperm branch (*Fig. 1D*).

*Specimens examined:* China, Inner Mongolia, Ningcheng County, Shantou Township, near Daohugou Village, Daohugou 1, Jiulongshan Formation, Callovian–Oxfordian boundary interval, latest Middle Jurassic. CNU-LICHEN-NN2019001, CNU-LICHEN-NN2020001, CNU-LICHEN-NN2020002, B0476P.

*Remarks:* The genus *Daohugouthallus* and species *D. ciliiferus* were published almost a decade ago (*Wang et al., 2010*); however, new anatomical characters were described only recently, based on scanning electron microscopy (*Fang et al., 2020*). Based on additional materials, phenotypic characters have been reassessed, including morphology and anatomy, and new information about the substrate ecology of the fossil has been added. Structural outline analysis of the thallus included not only the new material of the fossil but also a broad sampling of macrolichens, i.e. 61 extant species and two additional fossils from 12 families and six orders of Lecanoromycetes (*Table S1*). The geometric morphometric analysis of 140 images resulted in cumulative values for all the principal components were listed in *Table S2*. The cumulative eigenvalues for the main axes (principal components) with the cumulative variance of the first four principal components amounting to 61.1% (*Table S2*), meeting the requirements for geometric morphometric analysis. Among the canonical variate analysis (CVA) for four combinations of the four principal components (individual variances 24.4, 18.0, 10.8, 8.0; *Fig. 2*), the plot combining the first two principal components (cumulative variance 42.4) showed that the fossil *Daohugouthallus ciliiferus*, in group 2, appeared morphologically closest to foliose Parmeliaceae, in group 3, including the genera *Hypotrachyna* and *Hypogymnia* and two foliose Parmeliaceae fossils

(*Kaasalainen et al., 2017; Lücking and Nelsen, 2018*). However, placement of the fossil within the family Parmeliaceae is not possible, as the inferred stem age of Parmeliaceae is much younger than the age of the fossil (*Kraichak et al., 2018; Nelsen et al., 2020*). Therefore, a new family, Daohugouthallaceae is proposed, which is tentatively placed in the order Lecanorales given the close morphological similarity to Parmeliaceae.

# **Significance of the occurrence of Daohugouthallaceae**

We used the detailed molecular clock tree provided by *Nelsen et al. (2020)* to illustrate inferred ages for selected family-level clades in the Lecanoromycetes that include macrolichens (*Fig. 3*). Most of these families have stem node ages relative to the macrolichen genera contained therein substantially younger than 100 Mya, including Caliciaceae, Cladoniaceae, Pannariaceae, Parmeliaceae, Physciaceae, Ramalinaceae, Sphaerophoraceae, Stereocaulaceae and Teloschistaceae. The stem node ages of a few families including macrolichens were reconstructed as between 150 and 100 Mya, including Baeomycetaceae, Coccocarpiaceae, Collemataceae, Pannariaceae, Peltigeraceae, and Umbilicariaceae. However, all these families have a crown node age significantly younger than 165 Mya, the age of Daohugouthallaceae (*Fig. 4*). The only macrolichen family older than the fossil is Icmadophilaceae, with an inferred crown node age of approximately 200 Mya (*Figs 3–4*). However, members of this family differ strongly in ecology and morphology from Daohugouthallaceae (*Fig. 4*). In addition, the macrolichen genera within Icmadophilaceae distinctly diversified after the K–Pg boundary: *Siphula* approximately 48 Mya and *Thamnia* about 16 Mya (*Fig. S1*). If these estimates are correct, the Jurassic macrolichen cannot be included in any extant family containing macrolichens, and so the occurrence of Daohugouthallaceae in the Jurassic may reflect a scenario of early macrolichen diversification long before the diversification of extant lineages of epiphytic macrolichens.

## Discussion

### The phylogenetic placement of Daohugouthallaceae

The new family based on the fossil lichen *Daohugouthallus ciliiferus* is tentatively placed in Lecanorales, although sexual reproductive structures are missing that would allow to test this placement. Ascomata, asci and ascospores are crucial to assess systematic affinities within Lecanoromycetes (Hafellner, 1994) and have been demonstrated in fungal fossils as old as 400 Mya (Taylor et al., 2005). Apothecia-like structures seem to be present in the fossil (Fig. 1C), but no structures interpretable as asci and ascospores were detectable. The thin nature of compression fossils like *Daohugouthallus ciliiferus* makes it difficult for such structures to be preserved, if they were indeed present in the organism. Molecular phylogeny has also shaped the systematics of Lecanoromycetes (Thell et al., 2009; Miadlikowska et al., 2011; Leavitt et al., 2015; Magain et al., 2017). DNA has been presumably extracted and amplified from fossils as old as 250 Mya (Cano et al., 1993; Fish et al., 2002), but these findings have been challenged and considered artifactual (Pääbo et al., 2004). Successful DNA extraction from permineralized or compression fossils as old as *Daohugouthallus ciliiferus* seems impossible and so this is not an avenue that could be followed to clarify the systematic affinities of this and other lichen or fungal fossils.

In lieu of sexual reproductive structure evidence to clarify the potential affinities of Daohugouthallaceae, our geometric morphometric analysis seems a suitable alternative to provide at least a hypothesis based on quantitative data. This approach, based on homologous landmarks or structural outlines (Rohlf and Marcus, 1993), was here apparently used for the first time in this context but has been widely used in entomology (Bai et al., 2012, 2014; Ren et al., 2017). However, it requires a careful approach to data assessment (Fox et al., 2020). The CVA plots (Fig. 2) based on the comparison with homologous landmarks of 61 extant macrolichens and two Parmeliaceae fossils



showed that Daohugouthallaceae are most similar to foliose Parmeliaceae (Lecanorales). Given the much younger stem age of the latter (and other related families such as Physciaceae), the introduction of a new, monogeneric family for this fossil therefore seems justified.

The apparently smaller algal cells (1.5–2.1  $\mu\text{m}$  in diam.) and thinner fungal hyphae (1.2–1.5  $\mu\text{m}$  wide) in *Daohugouthallus ciliiferus* (Fig. 1G–J; Fang et al., 2020) compared to extant Lecanoromycetes, suggest that Daohugouthallaceae may have also originated from a relict clade outside Lecanoromycetes; however, it is unclear how the fossilization process may have affected these structures.

#### **The importance of Daohugouthallaceae for our understanding of macrolichen evolution**

Among the new specimens of *Daohugouthallus ciliiferus* collected from the type locality, one thallus was found attached to the branch of an unidentified cone-bearing gymnosperm fossil. The Daohugou paleoenvironment has been analyzed to be a gymnosperm-dominated forest vegetation (Ren and Krzeminski, 2002; Tan and Ren, 2002; Zhang et al., 2006), and *Daohugouthallus ciliiferus* has been reconstructed to be epiphytic on gymnosperms due to its association with a small seed cone (Wang et al., 2010), but in the original study the two fossils were not directly connected. Our new specimen (Fig. 1A) clearly shows the thallus growing directly on a thin branch of a gymnosperm with an associated cone (Fig. 1D), possibly representing a conifer, suggesting that gymnosperms may have served as substrate for epiphytic macrolichens already in the Jurassic. Extant lichenized clades that are largely epiphytic have been dated back to as far as the early Jurassic, such as microlichens in the Graphidaceae, Pyrenulaceae, and Trypetheliaceae (Lücking et al., 2013; Beimforde et al., 2014; Kraichak et al., 2018; Nelsen et al., 2019, 2020). However, the oldest extant macrolichen clade, *Umbilicaria*, is almost exclusively rock-dwelling (saxicolous), and while extant macrolichen vary

greatly in substrate choice (*Belnap et al., 2001; Brodo et al., 2001; Nash, 2008*), extant epiphytic macrolichen clades are consistently younger than the K–Pg boundary and only since then have evolved to form the conspicuous elements of terrestrial woody ecosystems they are today (*Ahti et al., 1993; Esslinger, 1985; Goward and McCune, 2007; McCune et al., 2000; Spribille and Muggia, 2013; Wei et al., 2017*). The fossil record and molecular clock studies indicate that gymnosperms diverged around 315 Mya (*Crisp and Cook, 2011; Nie et al., 2020*), while conifers originated approximately 300 Mya and diversified between 190–160 Mya in the Early to Middle Jurassic (*Leslie et al., 2018*) into the various families recognized today. The divergent time of Lecanoromycetes, the main class including epiphytic macrolichens, has been estimated at 300–250 Mya (*Nelsen and Lücking, 2018; Kraichak et al., 2018; Lutzoni et al., 2018; Nelsen et al., 2020*), and so it is conceivable that epiphytic macrolichens even older than *Daohugouthallus ciliiferus* may have existed.

The diversification of Lecanoromycetes coincides with the period after the end-Permian extinction. Before that time, diverse Permian forests existed around the world (*Behrensmeyer and Hook, 1992; Gulbranson et al., 2012; Wang et al., 2012*). While these could have provided potential environments for epiphytic macrolichens, there is no fossil record that would support such an assumption. The end-Triassic mass extinction 200 Mya greatly affected marine and terrestrial organisms (*Erwin, 2001; Damborenea et al., 2017*), but its effect on lichenized fungi is unclear. The ecology of terrestrial vegetation at that time, with diverse forests already in the Late Triassic and into the Jurassic (*Rees et al., 2004; Wang et al., 2005; Sellwood & Valdes, 2008; Bonis & Kürschner, 2012*), would certainly have supported the existence of epiphytic macrolichens, but again, no fossil record exists that would support such a hypothesis. In contrast, the diversification of the crown clades of extant conifers, between 190 and 160 Mya in the Early to Middle Jurassic (*Leslie et al., 2018*), coincides well with the

165 Mya *Daohugouthallus ciliiferus* fossil, thus providing the earliest known evidence of the existence of epiphytic macrolichens. Notably, various other groups of organisms underwent radiations in this period, such as mammals or the avian stem lineage (Benson *et al.*, 2014; Close *et al.*, 2015). The Mid-Mesozoic era was a cooling and greenhouse period (Willis and Niklas, 2004) and the palaeoenvironment of the Daohugou formation has been described as humid, warm-temperate and montane (Ren and Krzeminski, 2002; Tan and Ren, 2002; Zhang *et al.*, 2006), thus favoring the potential growth of epiphytic macrolichens, as shown by the ecology of extant macrolichen lineages in the tropics. The presence of a fossil macrolichen such as *Daohugouthallus ciliiferus* is therefore not surprising and we expect that other macrolichen morphotypes may be found in this and other formations of the Mesozoic, hopefully expanding the evidence for the diversification of macrolichen lineage well before the most recent mass extinction event, the K–Pg boundary.

## Materials and Methods

**Geological context:** Specimens in this study were collected from the Daohugou locality of the Jiulongshan Formation, near Daohugou Village, Ningcheng County, approximately 80 km south of Chifeng City, in the Inner Mongolia Autonomous Region, China (119°14.318'E, 41°18.979'N). The age of this formation is 168–152 Ma based on  $^{40}\text{Ar}/^{39}\text{Ar}$  and  $^{206}\text{Pb}/^{238}\text{U}$  isotopic analyses (He *et al.*, 2004; Liu *et al.*, 2006; Ren *et al.*, 2019).

**Experimental methods:** The lichen fossils were examined and photographed using an Olympus SZX7 Stereomicroscope attached to a Mshot MD50 digital camera system. For selected fossil we made cross sections using a stonecutter, then sputter-coated these with gold particles using Ion Sputter E-1045 (HITACHI). SEM images were recorded using a scanning electron microscope (Hitachi SU8010) with a secondary electron detector operated at 5.0 kV. Plates were composed in Adobe Photoshop. All lab

work was performed at the Institute of Microbiology, Chinese Academy of Sciences in Beijing, except the stonecutter which was located at the Institute of Geology and Geophysics, Chinese Academy of Sciences in Beijing.

**Specimen repository:** Fossil specimens of *Daohugouthallus ciliiferus* (CNU-LICHEN-NN2019001, CNU-LICHEN-NN2020001, CNU-LICHEN-NN2020002, B0476P) are deposited in the Key Lab of Insect Evolution and Environmental Changes, College of Life Sciences and Academy for Multidisciplinary Studies, Capital Normal University, in Beijing, China.

**Geometric morphometrics:** Absence of diagnostic characters such as ascomata, asci and ascospores in the adpression fossil *Daohugouthallus ciliiferus* made it difficult to place into extant lineages. Therefore, we focused on thallus characters, mainly the topology of lobes or branches, to implement geometric morphometric analysis, based on a curve connected by tracing the points of the ends of lobes or branches. The starting point of the curve was selected as a point on the upper edge of the lobe or branch near the center or substrate, and after describing the outline of the whole lobe or branch, the end point returning to the lower edge near the starting point. For this purpose, 113 images of 61 representative extant macrolichen species were selected from 12 families and 6 orders of Lecanoromycetes (*Table S1*), including specimens deposited in HMAS-L, photos provided by Robert Lücking, and pictures downloaded from the CNALH (Consortium of North American Herbaria) Image Library <https://lichenportal.org/cnalh/imagelib/> and the *Hypogymnia* Media Gallery <http://hypogymnia.myspecies.info/gallery>, together with two images of accepted Parmeliaceae fossils (Kaasalainen *et al.*, 2017).

A total of 140 images (*Fig. S3*), including the above-mentioned images and the *Daohugouthallus ciliiferus* fossil images, were cut into 25 sub-images and used as test groups. The whole image set was

divided into five groups according to lobes types: microfoliose group, the *Daohugouthallus ciliiferus* fossil group, a long branches group, a wide-lobed group, and a fruticose group (*Table S3*). The selected images were two-dimensional graphs with two views of the front or back of the thallus where the branch tips were clearly recognizable. To orientate the images in the same direction, they were adjusted so that the end of the branches faced right. Images were named in a unified format: growth type-order-family-genus-species (sample number) except for the two selected reference fossil images only corresponding to family name.

As stated, the external forms were represented by one curve extracted from the end of branches or lobes and the curve was resampled into 60 semi-landmarks by length (*Fig. S2*). The curves and semi-landmarks were digitized using TPS-DIG 2.05 (*Rohlf, 2006*). To merge all semi-landmarks into the same data file to produce the data set for morphological analysis, the data file was opened as text file to convert the semi-landmarks to landmarks, by deleting the line with the curve number and point number and replacing the landmark number by the point number (*Tong et al., 2021*).

MORPHO J 1.06a (*Klingenberg, 2011*) was used for subsequent analysis of the data set. Through Procrustes analysis, the morphological data of all test features were placed in the same dimensional vector space to screen out physical factors such as size. Principal component analysis (PCA) and geometric modeling of the mathematical space formed by PC axis were used to coordinate the shape changes of the entire dataset. We then selected the data set to generate a covariance matrix. In this context, the first two principal components corresponding to the highest cumulative variance represent the best variation pattern of test shape. The relationships among different morphological groups were then visualized through canonical variate analysis (CVA).

## Acknowledgments

**General:** We thank Mr. Yijie Tong for assisting in geometric morphometrics analysis, Dr. Chunli Li for assisting in taking SEM photos, Ms. Hong Deng and Ms. Haijuan Chen for lending and taking photos of lichen specimens in HMAS-L, Ms. Xiaoran Zuo for drawing the habitus reconstruction picture *Fig. 5*, and Mr. Jujie Guo for making the fossil slices.

**Funding:** This work was supported by the National Natural Science Foundation of China (grant 31770022 and 32070096 to X.W.; grant 31970383 to Y.W.; grants 31730087, 41688103, 32020103006 to D.R.; grant 31961143002 to M.B.) and Ministry of Science and Technology of China (grant 2019FY101808 to X.W.); the Beijing Natural Science Foundation (grant 5192002 to Y.W.).

**Author contributions:** QXY: Literatures investigation, geometric morphometric analysis, molecular data collection and analysis, original draft editing; YYW: SEM photos taking and analysis, molecular data analysis, original draft editing; RL: Conceptualization, molecular analysis, validation, draft review and editing; TL: Conceptualization, validation, draft review and editing; XW: Fossil lichen and plant identification, draft review and editing; ZYD: molecular analysis; YKC: Geometric morphometric analysis; MB: Geometric morphometric analysis, draft review and editing; JCW: Conceptualization, supervision, validation, draft review and editing; DR: Conceptualization, resources collection, supervision, project administration, validation, funding acquisition, draft review and editing; HL: Conceptualization, molecular analysis, validation, draft review and editing; YJW: Conceptualization, resources collection, supervision, funding acquisition, validation, draft review and editing; XLW: Conceptualization, supervision, geometric morphometric analysis, SEM photos taking and analysis, data curation, funding acquisition, project administration, validation, original draft writing, review and editing.

## References

318 Ahti T, Stenroos S, Filho LX. 1993. The lichen family Cladoniaceae in Paraiba, Pernambuco and Sergipe,  
319 Northeast Brazil. *Tropical Bryology* **7**: 55–70. DOI: <https://doi.org/10.11646/bde.7.1.6>

320 Bai M, Ahrens D, Yang XK, Ren D. 2012. New fossil evidence of the early diversification of scarabs:  
321 *Alloioscarabaeus cheni* (Coleoptera: Scarabaeoidea) from the Middle Jurassic of Inner Mongolia,  
322 China. *Insect Science* **19**: 159–171. DOI: <https://doi.org/10.1111/j.1744-7917.2011.01460.x>

323 Bai M, Yang XK, Li J, Wang WC. 2014. Geometric Morphometrics, a super scientific computing tool in  
324 morphology comparison. *Chinese Science Bulletin (Chinese Version)* **59**: 887–894. DOI:  
325 <https://doi.org/10.1360/972012-1561>

326 Behrensmeyer AK, Hook RW. 1992. Paleoenvironmental contexts and taphonomic modes. In:  
327 Behrensmeyer AK, Damuth JD, Dimichele WA, Potts, Sues H, Wing SL. (Eds.), *Terrestrial*  
328 *Ecosystems Through Time, Evolutionary Paleocology of Terrestrial Plants and Animals*. (The  
329 University of Chicago Press, Chicago, London), pp 15–136.

330 Beimforde C, Feldberg K, Nylinder S, Rikkinen J, Tuovila H, Dörfelt H, Gube M, Jackson DJ, Reitner  
331 J, Seyfullah LJ, Schmidt AR. 2014. Estimating the Phanerozoic history of the Ascomycota lineages:  
332 combining fossil and molecular data. *Molecular phylogenetics and evolution* **78**: 386–398. DOI:  
333 <https://doi.org/10.1016/j.ympev.2014.04.024>

334 Belnap J, Büdel B, Lange OL. 2001. Biological soil crusts: characteristics and distribution. In: Belnap  
335 J, Lange OE (Eds.), *Biological Soil Crusts: Structure, Function, and Management* (Ecological  
336 Studies 150). Springer, Berlin, Heidelberg, pp. 330. DOI: [https://doi.org/10.1007/978-3-642-](https://doi.org/10.1007/978-3-642-56475-8_1)  
337 [56475-8\\_1](https://doi.org/10.1007/978-3-642-56475-8_1)

338 Benson RBJ, Campione NE, Carrano MT, Mannion PD, Sullivan C, Upchurch P, and Evans DC. 2014.  
339 Rates of dinosaur body mass evolution indicate 170 million years of sustained ecological innovation

on the avian stem lineage. *PLoS Biology* **12**(5): e1001853. DOI: <https://doi.org/10.1371/journal.pbio.1001853>

Bonis NR, Kürschner WM. 2012. Vegetation history, diversity patterns, and climate change across the Triassic/Jurassic boundary. *Paleobiology* **38**(2): 240–264. DOI: <https://doi.org/10.1666/09071.1>

Brodo IM, Sharnoff SD, Sharnoff S. 2001. Lichens of North America. Yale University Press, New Haven, CT, p. 795. DOI: <https://doi.org/10.29173/bluejay5827>

Cano RJ, Poinar HN, Pieniazek NJ, Acra A, Poinar GO. 1993. Amplification and sequencing of DNA from a 120–135-million-year-old weevil. *Nature* **363**(6429): 536–538. DOI: <https://doi.org/10.1038/363536a0>

Chen J, Blume H, Beyer L. 2000. Weathering of rocks induced by lichen colonization-a review. *Catena* **39**: 121–146. DOI: [https://doi.org/10.1016/S0341-8162\(99\)00085-5](https://doi.org/10.1016/S0341-8162(99)00085-5)

Close RA, Friedman M, Lloyd GT, Benson RBJ. 2015. Evidence for a mid-Jurassic adaptive radiation in mammals. *Current Biology* **25** (16): 2137–2142. DOI: <https://doi.org/10.1016/j.cub.2015.06.047>

Cornelissen JHC, Lang SI, Soudzilovskaia NA, During HJ. 2007. Comparative cryptogam ecology: A review of bryophyte and lichen traits that drive biogeochemistry. *Annals of Botany* **99**(5): 987–1001. DOI: <https://doi.org/10.1093/aob/mcm030>

Crisp MD, Cook LG. 2011. Cenozoic extinctions account for the low diversity of extant gymnosperms compared with angiosperms. *New Phytologist* **192**: 997–1009. DOI: <https://doi.org/10.1111/j.1469-8137.2011.03862.x>

Damborenea SE, Echevarría J, Ros-Franch S. 2017. Biotic recovery after the end-Triassic extinction event: Evidence from marine bivalves of the Neuquén Basin, Argentina. *Palaeogeography, Palaeoclimatology, Palaeoecology* **487**: 93–104. DOI:



362 <http://dx.doi.org/10.1016/j.palaeo.2017.08.025>

363 Erwin DH. 2001. Lessons from the past: Biotic recoveries from mass extinctions. *Proceedings of the*

364 *National Academy of Sciences* **98(10)**: 5399–5403. DOI: <https://doi.org/10.1073/pnas.091092698>

365 Esslinger TL. 1985. Studies in the lichen family Physciaceae .6. 2 Species New to North-America.

366 *Mycotaxon* **23(1-4)**: 219–222.

367 Fang H, Labandeira CC, Ma YM, Zheng BY, Ren D, Wei XL, Liu JX, Wang YJ. 2020. Lichen mimesis

368 in mid-Mesozoic lacewings. *eLife* **9**: e59007. DOI: <https://doi.org/10.7554/eLife.59007>

369 Fish SA, Shepherd TJ, McGenity TJ, Grant WD. 2002. Recovery of 16S ribosomal RNA gene fragments

370 from ancient halite. *Nature* **417(6887)**: 432–436. DOI: <https://doi.org/10.1038/417432a>

371 Fox NS, Veneracion JJ, Blois JL. 2020. Are geometric morphometric analyses replicable? Evaluating

372 landmark measurement error and its impact on extant and fossil *Microtus* classification. *Ecology and*

373 *Evolution* **10(7)**: 3260–3275. DOI: <https://doi.org/10.1002/ece3.6063>

374 Goward T, McCune B. 2007. *Hypogymnia canadensis* (Parmeliaceae), a new lichen from the Pacific

375 Coast of North America. *Bryologist* **110(4)**: 808–811. DOI: [https://doi.org/10.1639/0007-](https://doi.org/10.1639/0007-2745(2007)110[808:HCPANL]2.0.CO;2)

376 [2745\(2007\)110\[808:HCPANL\]2.0.CO;2](https://doi.org/10.1639/0007-2745(2007)110[808:HCPANL]2.0.CO;2)

377 Gulbranson EL, Isbell JL, Taylor EL, Ryberg PE, Taylor TN, Flaig PP. 2012. Permian polar forests:

378 deciduousness and environmental variation. *Geobiology* **10(6)**: 479–495. DOI:

379 <https://doi.org/10.1111/j.1472-4669.2012.00338.x>

380 Hafellner J. 1994. Problems in Lecanorales systematics. In: Hawksworth DL (ed.), *Ascomycete*

381 *Systematics: Problems and perspectives in the Nineties*. Plenum Press: New York and London. pp.

382 315–320. DOI: [https://doi.org/10.1007/978-1-4757-9290-4\\_28](https://doi.org/10.1007/978-1-4757-9290-4_28)

383 Hawksworth DL, Grube M. 2020. Lichens redefined as complex ecosystems. *New Phytologist* **227(5)**:

1281. DOI: <https://doi.org/10.1111/nph.16630>

He HY, Wang XL, Zhou ZH, Zhu RX, Jin F, Wang F, Ding X, Boven A. 2004.  $^{40}\text{Ar}/^{39}\text{Ar}$  dating of ignimbrite from Inner Mongolia, northeastern China, indicates a post-Middle Jurassic age for the overlying Daohugou Bed. *Geophysical Research Letters* 31, L20609. DOI: <https://doi.org/10.1029/2004GL020792>

Honegger R, Edwards D, Axe L. 2013. The earliest records of internally stratified cyanobacterial and algal lichens from the Lower Devonian of the Welsh Borderland. *New Phytologist* 197: 264–275. DOI: <https://doi.org/10.1111/nph.1200>

Huang JP, Kraichak EK, Leavitt SD, Nelsen MP, Lumbsch HT. 2019. Accelerated diversifications in three diverse families of morphologically complex lichen-forming fungi link to major historical events. *Scientific Reports* 9: 8518. DOI: <https://doi.org/10.1038/s41598-019-44881-1>

James TY, Kauff F, Schoch CL, Matheny PB, Hofstetter V, Cox CJ, Celio G, Gueidan C, Fraker E, Miadlikowska J, Lumbsch HT, Rauhut A, Reeb V, Arnold AE, Amtoft A, Stajich JE, Hosaka K, Sung G-H, Johnson D, O'Rourke B, Crockett M, Binder M, Curtis JM, Slot JC, Wang Z, Wilson AW, Schüßler A, Longcore JE, O'Donnell K, Mozley-Standridge S, Porter D, Letcher PM, Powell MJ, Taylor JW, White MM, Griffith GW, Davies DR, Humber RA, Morton JB, Sugiyama J, Rossman A, Rogers J, Pfister D, Hewitt D, Hansen K, Hambleton S, Kohlmeyer J, Volkmann-Kohlmeyer B, Spotts RA, Serdani M, Crous PW, Hughes KW, Matsuura K, Langer E, Langer G, Untereiner WA, Lucking R, Budel B, Geiser DM, Aptroot A, Diederich P, Schmitt I, Schultz M, Yahr R, Hibbett DS, Lutzoni F, McLaughlin D, Spatafora J, Vilgalys R. 2006. Reconstructing the early evolution of the fungi using a sixgene phylogeny. *Nature*. 443: 818–822. DOI: <https://doi.org/10.1038/nature05110>

Kaasalainen U, Heinrichs J, Krings M, Myllys L, Grabenhorst H, Rikkinen J, Schmidt AR. 2015.

406 Alectorioid morphologies in paleogene lichens: new evidence and re-evaluation of the fossil  
 407 *Alectoria succini* Mägdefrau. *PLoS One* **10** (6): e0129526. DOI:  
 408 <https://doi.org/10.1371/journal.pone.0129526>

409 Kaasalainen U, Schmidt AR, Rikkinen J. 2017. Diversity and ecological adaptations in Palaeogene  
 410 lichens. *Nature Plants* **3**: 17049. DOI: <https://doi.org/10.1038/nplants.2017.49>

411 Klingenberg CP. 2011. Computer program note MorphoJ: an integrated software package for geometric  
 412 morphometrics. *Molecular Ecology Resources* **11**: 353–357. DOI: [https://doi.org/10.1111/j.1755-](https://doi.org/10.1111/j.1755-0998.2010.02924.x)  
 413 [0998.2010.02924.x](https://doi.org/10.1111/j.1755-0998.2010.02924.x)

414 Kraichak E, Divakar PK, Crespo A, Leavitt SD, Nelsen MP, Lücking R, Lumbsch HT. 2015. A tale of  
 415 two hyper-diversities: diversification dynamics of the two largest families of lichenized fungi.  
 416 *Scientific Reports* **5**: 10028. DOI: <https://doi.org/10.1038/srep10028>

417 Kraichak E, Huang JP, Nelsen M, Leavitt SD, Lumbsch HT. 2018. A revised classification of orders and  
 418 families in the two major subclasses of Lecanoromycetes (Ascomycota) based on a temporal  
 419 approach. *Botanical Journal of the Linnean Society* **188**(3): 233–249. DOI:  
 420 <https://doi.org/10.1093/botlinnean/boy060>

421 Leavitt SD, Divakar PK, Ohmura Y, Wang LS, Esslinger TL, Lumbsch HT. 2015. Who's getting around?  
 422 Assessing species diversity and phylogeography in the widely distributed lichen-forming fungal  
 423 genus *Montanelia* (Parmeliaceae, Ascomycota). *Molecular Phylogenetics and Evolution* **90**: 85–96.  
 424 DOI: <https://doi.org/10.1016/j.ympev.2015.04.029>

425 Leslie AB, Beaulieu J, Holman G, Campbell CS, Mei W, Raubeson LR, Mathews S. 2018. An overview  
 426 of extant conifer evolution from the perspective of the fossil record. *American Journal of Botany*  
 427 **105**(9): 1531–1544. DOI: <https://doi.org/10.1002/ajb2.1143>

428 Lindsay D. 1978. The role of lichens in Antarctic ecosystems. *Bryologist* **81**: 268–276. DOI:  
 429 <https://doi.org/10.2307/3242188>

430 Liu YQ, Liu YX, Ji S, Yang ZQ. 2006. U–Pb zircon age for the Daohugou Biota at Ningcheng of Inner  
 431 Mongolia and comments on related issues. *Chinese Science Bulletin* 51, 2634–2644. DOI:  
 432 <https://doi.org/10.1007/s11434-006-2165-2>

433 Lücking R, Tehler A, Bungartz F, Rivas Plata E, Lumbsch HT. 2013. Journey from the West: did tropical  
 434 Graphidaceae (lichenized Ascomycota: Ostropales) evolve from a saxicolous ancestor along the  
 435 American Pacific coast? *American Journal of Botany* **100**(5): 844–856. DOI:  
 436 <https://doi.org/10.3732/ajb.1200548>

437 Lücking R, Hodkinson BP, Leavitt SD. 2017. The 2016 classification of lichenized fungi in the  
 438 Ascomycota and Basidiomycota – Approaching one thousand genera. *The Bryologist* **119**: 361–416.  
 439 DOI: <https://doi.org/10.1639/0007-2745-119.4.361>

440 Lücking R, Nelsen MP. 2018. Ediacarans, protolichens, and lichen-derived *Penicillium*: a critical  
 441 reassessment of the evolution of lichenization in fungi. In: Transformative paleobotany, pp. 551–590.  
 442 Academic Press. DOI: <https://doi.org/10.1016/B978-0-12-813012-4.00023-1>

443 Lumbsch HT, Rikkinen J. 2017. Evolution of lichens. In: Dighton J, White J, Boca Raton FL (eds), The  
 444 fungal community: its organization and role in the ecosystem. CRC Press: 53–62. DOI:  
 445 <https://doi.org/10.1201/9781315119496-5>

446 Lutzoni F, Nowak MD, Alfaro ME, Reeb V, Miadlikowska J, Krug M, Arnold AE, Lewis LA, Swofford  
 447 DL, Hibbett D, Hilu K, James TY, Quandt D, Magallón S. 2018. Contemporaneous radiations of  
 448 fungi and plants linked to symbiosis. *Nature Communications* **9**: 5451. DOI:  
 449 <https://doi.org/10.1038/s41467-018-07849-9>

450 Magain N, Madlikowska J, Mueller O, Gajdeczka M, Truong C, Salamov AA, Dubchak I, Grigoriev IV,  
451 Goffinet B, Sérusiaux E, Lutzoni F. 2017. Conserved genomic collinearity as a source of broadly  
452 applicable, fast evolving, markers to resolve species complexes: A case study using the lichen-  
453 forming genus *Peltigera* section *Polydactylon*. *Molecular Phylogenetics and Evolution* **117**: 10–29.  
454 DOI: <https://doi.org/10.1016/j.ympev.2017.08.013>

455 Matsunaga KKS, Stockey RA, Tomescu AMF. 2013. *Honeggeriella complexa* gen. et sp. nov., a  
456 heteromorous lichen from the lower cretaceous of Vancouver Island (British Columbia, Canada)  
457 *American Journal of Botany* **100** (2): 450–459. DOI: <https://doi.org/10.3732/ajb.1200470>

458 McCune B, Rosentreter R, Ponzetti JM, Shaw DC. 2000. Epiphyte habitats in an old conifer forest in  
459 Western Washington, USA. *Bryologist* **103** (3): 417–427. DOI: [https://doi.org/10.1639/0007-2745\(2000\)103\[0417:EHIAOC\]2.0.CO;2](https://doi.org/10.1639/0007-2745(2000)103[0417:EHIAOC]2.0.CO;2)

460 [2745\(2000\)103\[0417:EHIAOC\]2.0.CO;2](https://doi.org/10.1639/0007-2745(2000)103[0417:EHIAOC]2.0.CO;2)

461 Miadlikowska J, Schoch CL, Kageyama SA, Molnar K, Lutzoni F, McCune B. 2011. *Hypogymnia*  
462 phylogeny, including *Cavernularia*, reveals biogeographic structure. *Bryologist* **114** (2): 392–400.  
463 DOI: <https://doi.org/10.1639/0007-2745-114.2.392>

464 Nash TH III. 2008. *Lichen Biology*. 2nd ed. Cambridge, UK: Cambridge University Press.

465 Nelsen MP, Lücking R, Boyce CK, Lumbsch HT, Ree RH. 2019. No support for the emergence of lichens  
466 prior to the evolution of vascular plants. *Geobiology* **18**, 3–13. DOI:  
467 <https://doi.org/10.1111/gbi.12369>

468 Nelsen MP, Lücking R, Boyce CK, Lumbsch HT, Ree RH. 2020. The macroevolutionary dynamics of  
469 symbiotic and phenotypic diversification in lichens. *Proceedings of the National Academy of*  
470 *Sciences* **117**(35): 21495–21503. DOI: <https://doi.org/10.1073/pnas.2001913117>

471 Nie Y, Foster CSP, Zhu TQ, Yao R, Duchêne DA, Ho SYW, Zhong BJ. 2020. Accounting for uncertainty

472 in the evolutionary timescale of green plants through clock-partitioning and fossil calibration  
 473 strategies. *Systematic Biology* **69** (1): 1–16. DOI: <https://doi.org/10.1093/sysbio/syz032>

474 Pääbo S, Poinar H, Serre D, Jaenicke-Despres V, Hebler J, Rohland N, Kuch M, Krause J, Vigilant L,  
 475 Hofreiter M. 2004. Genetic analyses from ancient DNA. *Annual Review of Genetics* **38**(1): 645–679.  
 476 DOI: <https://doi.org/10.1146/annurev.genet.37.110801.143214>

477 Rees PM, Noto CR, Parrish JM, Parrish JT. 2004. Late Jurassic climates, vegetation, and dinosaur  
 478 distributions. *The Journal of Geology* **112**(6): 643–653. DOI: <https://doi.org/10.1086/424577>

479 Ren D, Krzeminski W. 2002. Eoptychopteridae (Diptera) from the Middle Jurassic of China. *Annales*  
 480 *Zoologici* **52**: 207–210.

481 Ren D, Shih CK, Gao TP, Wang YJ, Yao YZ. 2019. Rhythms of insect evolution—evidence from the  
 482 Jurassic and Cretaceous in Northern China. Wiley Blackwell, New York. DOI:  
 483 <https://doi.org/10.1002/9781119427957>

484 Ren J, Bai M, Yang XK, Zhang RZ, Ge SQ. 2017. Geometric morphometrics analysis of the hind wing  
 485 of leaf beetles: proximal and distal parts are separate modules. *ZooKeys* **685**: 131–149. DOI:  
 486 <https://doi.org/10.3897/zookeys.685.13084>

487 Rohlf FJ. 2006. tpsDig, Digitize Landmarks and Outlines, Version 2.05. Stony Brook, NY: Department  
 488 of Ecology and Evolution, State University of New York.

489 Rohlf FJ, Marcus LF. 1993. A revolution in morphometrics. *Trends in Ecology & Evolution* **8**: 129–132.  
 490 DOI: [https://doi.org/10.1016/0169-5347\(93\)90024-J](https://doi.org/10.1016/0169-5347(93)90024-J)

491 Sellwood BW, Valdes PJ. 2008. Jurassic climates. *Proceedings of the Geologists' Association* **119**(1): 5–  
 492 17. DOI: [https://doi.org/10.1016/S0016-7878\(59\)80068-7](https://doi.org/10.1016/S0016-7878(59)80068-7)

493 Spribille T, Muggia L. 2013. Expanded taxon sampling disentangles evolutionary relationships and

494 reveals a new family in Peltigerales (Lecanoromycetidae, Ascomycota). *Fungal Diversity* **58**: 171–  
 495 184. DOI: <https://doi.org/10.1007/s13225-012-0206-5>

496 Spribille T, Tuovinen V, Resl P, Vanderpool D, Wolinski H, Aime MC, Schneider K, Stabentheiner E,  
 497 Toome-Heller M, Thor G, Mayrhofer H. 2016. Basidiomycete yeasts in the cortex of ascomycete  
 498 macrolichens. *Science* **353**(6298): 488–492. DOI: <https://doi.org/10.1126/science.aaf8287>

499 Tan JJ, Ren D. 2002. Palaeoecology of insect community from Middle Jurassic Jiulongshan Formation  
 500 in Ningcheng County, Inner Mongolia, China. *Acta Zootaxonomica Sinica* **27**: 428–434.

501 Taylor TN, Hass H, Kerp H, Krings M, Hanlin RT. 2005. Perithecial ascomycetes from the 400 million  
 502 year old Rhynie chert: an example of ancestral polymorphism. *Mycologia* **97**(1): 269–285. DOI:  
 503 <https://doi.org/10.1080/15572536.2006.11832862>

504 Thell A, Högnabba F, Elix JA, Feuerer T, Kärnefelt I, Myllys L, Randlane T, Andres Saag A, Stenroos S,  
 505 Ahti T, Seaward MRD. 2009. Phylogeny of the cetrarioid core (Parmeliaceae) based on five genetic  
 506 markers. *The Lichenologist* **41**: 489–511. DOI: <https://doi.org/10.1017/S0024282909990090>

507 Tong YJ, Yang HD, Jenkins Shaw J, Yang XK, Bai M. 2021. The relationship between genus/species  
 508 richness and morphological diversity among subfamilies of jewel beetles. *Insects* **12**(1): 24. DOI:  
 509 <https://doi.org/10.3390/insects12010024>

510 Wang J, Pfefferkorn HW, Zhang Y, Feng Z. 2012. Permian vegetational Pompeii from Inner Mongolia  
 511 and its implications for landscape paleoecology and paleobiogeography of Cathaysia. *Proceedings*  
 512 *of the National Academy of Sciences* **109**(13): 4927–4932. DOI:  
 513 <https://doi.org/10.1073/pnas.1115076109>

514 Wang Y, Mosbrugger V, Zhang H. 2005. Early to Middle Jurassic vegetation and climatic events in the  
 515 Qaidam Basin, Northwest China. *Palaeogeography, Palaeoclimatology, Palaeoecology* **224**(1–3):

516 200–216. DOI: <https://doi.org/10.1016/j.palaeo.2005.03.035>

517 Wang X, Krings M, Taylor NT. 2010. A thalloid organism with possible lichen affinity from the Jurassic

518 of northeastern China. *Rev. Review of Palaeobotany and Palynology* **162**: 591–598. DOI:

519 <https://doi.org/10.1016/j.revpalbo.2010.07.005>

520 Wei XL, Leavitt S, Huang JP, Esslinger TL, Wang LS, Moncada B, Lücking R, Divakar PK, Lumbsch

521 HT. 2017. Parallel Miocene-dominated diversification of the lichen-forming fungal genus *Oropogon*

522 (Parmeliaceae, Ascomycota) in different continents. *Taxon* **66** (6): 1269–1281. DOI:

523 <https://doi.org/10.12705/666.1>

524 Widhalm TJ, Grewe F, Huang JP, Mercado-Díaz JA, Goffinet B, Lücking R, Moncada B, Mason-Gamer

525 R, Lumbsch HT. 2019. Multiple historical processes obscure phylogenetic relationships in a

526 taxonomically difficult group (Lobariaceae, Ascomycota). *Scientific Reports* **9**: 8968. DOI:

527 <https://doi.org/10.1038/s41598-019-45455-x>

528 Willis KJ, Niklas KJ. 2004. The role of Quaternary environmental change in plant macroevolution: the

529 exception or the rule? *Philosophical Transactions: Biological Sciences* **359**: 159–172. DOI:

530 <https://doi.org/10.1098/rstb.2003.1387>

531 Wu L, Lan SB, Zhang DL, Hu CX. 2011. Small-scale vertical distribution of algae and structure of lichen

532 soil crusts. *Microbial Ecology* **62**: 715–724. DOI: <https://doi.org/10.1007/s00248-011-9828-5>

533 Zhang K, Yang D, Ren D. 2006. The first snipe fly (Diptera: Rhagionidae) from the Middle Jurassic of

534 Inner Mongolia, China. *Zootaxa* **1134**: 51–57. DOI: <https://doi.org/10.11646/zootaxa.1134.1.3>

535 Ziegler R. 2001. Fossiler Pflanzenmoder aus dem Keuper, *Documenta naturae* **112**: 1–65.

536



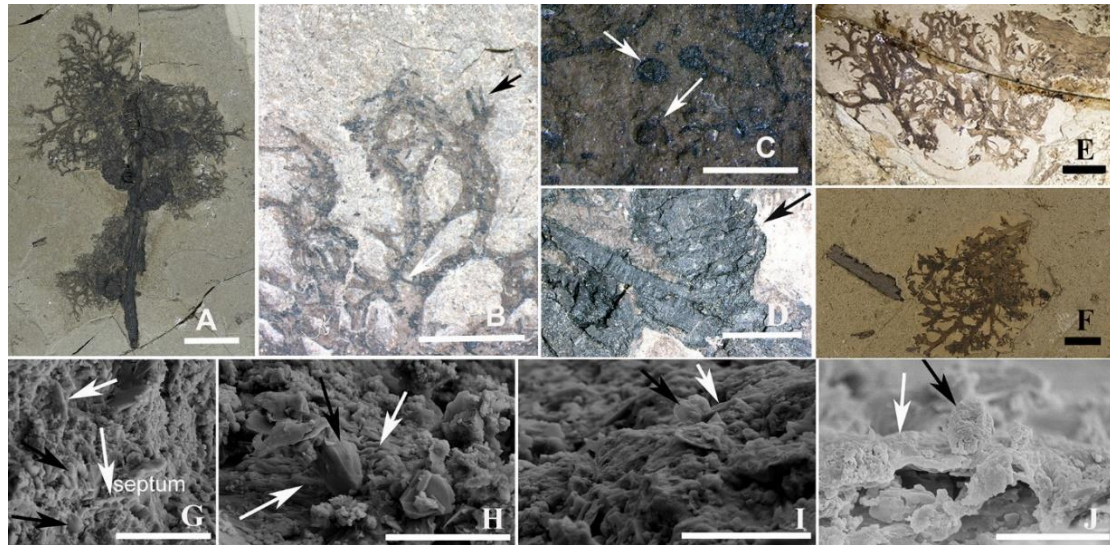

**Fig. 1. Photos of lichen *Daohugouthallus ciliiferus*.** (A). External morphology of lichen thallus directly growing on the gymnosperm branch, CNU-LICHEN-NN2020001. (B). Marginal rhizinate cilia and lobules marked by white and black arrows, respectively, CNU-LICHEN-NN2020001; (C). Superficial and nearly immersed unknown disc-like structure, CNU-LICHEN-NN2020001. (D). Gymnosperm branch with seed cones marked by black arrow, CNU-LICHEN-NN2020001. (E). External morphology of lichen thallus of CNU-LICHEN-NN2019001. (F). External morphology of lichen thallus of CNU-LICHEN-NN2019002. Scanning electron microscopy (SEM) of *Daohugouthallus ciliiferus*. (G-H). CNU-LICHEN-NN2020001. (I). CNU-LICHEN-NN2020002. (J). CNU-LICHEN-NN2019001. Scale bars: The fungal hyphae and algal cells indicated by white and black arrows, respectively. A, B, E=1cm; C, F=5mm; D=1mm; G=5 μm; H-J= 4 μm.

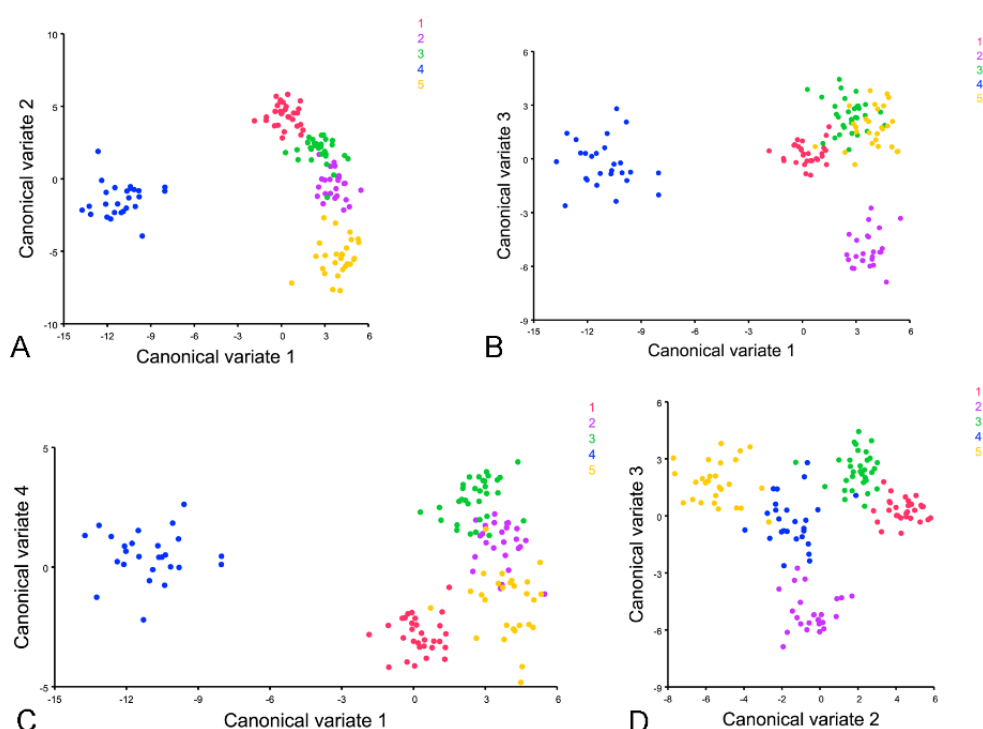

**Fig. 2. CVA plots based on the geometric morphometrics analysis (the first four principal components).** (A). CVA plot based on the highest Cumulative value 42.385 corresponding to the sum of the first principal component with the Variance value 24.433 and the second (17.952). (B). CVA plot based on the Cumulative value 35.271 corresponding to the sum of the first principal component with the Variance value 24.433 and the third (10.838). (C). CVA plot based on the Cumulative value 32.457 corresponding to the sum of the first principal component with the Variance value 24.433 and the fourth (8.024). (D). CVA plot based on the Cumulative value 28.79 corresponding to the sum of the second principal component with the Variance value 17.952 and the third (10.838). Different colors represented different groups (Table S3). The distance showed the degree of similarity between different groups. Group 1 in red: FO-C-*Physcia* (Physciaceae, Caliciales)/FO-P-*Coccocarpia* (Coccocarpiaceae, Peltigerales)/FO-P-*Pannaria* (Pannariaceae, Peltigerales), group 2 in purple: FO-L-*Daohugouthallus*, group 3 in green: FO-L-Accepted foliose Parmeliaceae fossil/*Hypotrachyna*/*Hypogymnia* (Parmeliaceae, Lecanorales), group 4 in blue: FO-P-*Peltigera* (Peltigeraceae, Peltigerales)/*Lobaria*/*Sticta* (Lobariaceae, Peltigerales)/FO-U-*Umbilicaria* (Umbilicariaceae, Umbilicariales), group 5 in orange: FR-L- Accepted fruticose Parmeliaceae fossil/*Cladonia* (Cladoniaceae, Lecanorales) /*Evernia* (Parmeliaceae, Lecanorales)/*Ramalina* (Ramalinaceae, Lecanorales)/*Sphaerophorus* (Sphaerophoraceae, Lecanorales)/FR-P-*Siphula* (Icmadophilaceae, Pertusariales)/FR-T-*Teloschistes* (Teloschistaceae, Teloschistales).

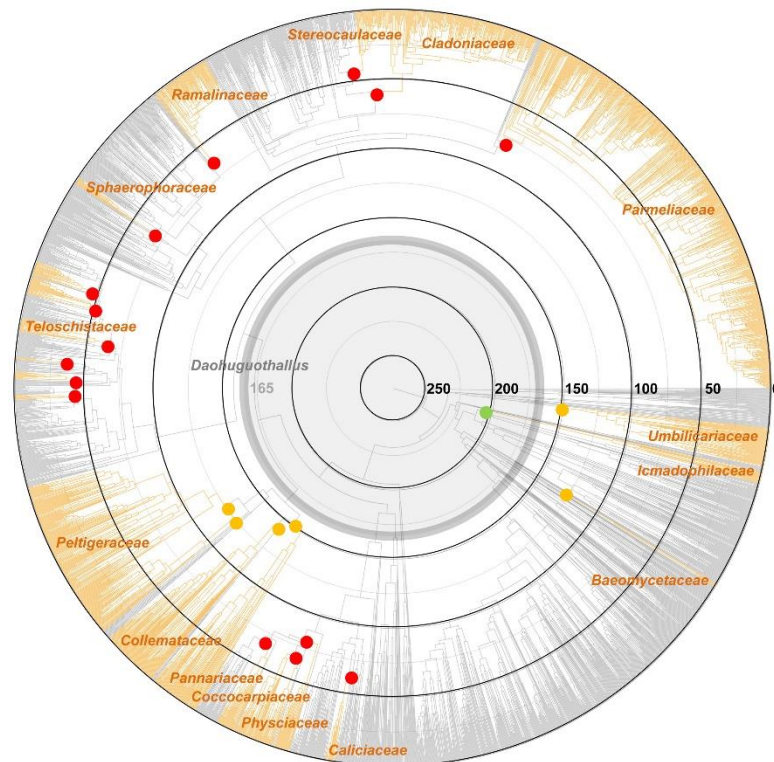

**Fig. 3. Time-calibrated ML phylogeny of 3,373 Lecanoromycetes fungi** (based on *Nelsen et al.*, 2020). Macrolichen lineages are indicated in orange and the corresponding families are indicated. The temporal placement of the *Daohugouthallus ciliiferus* fossil is marked by the bold gray circle. For details see Suppl. Fig. S1.

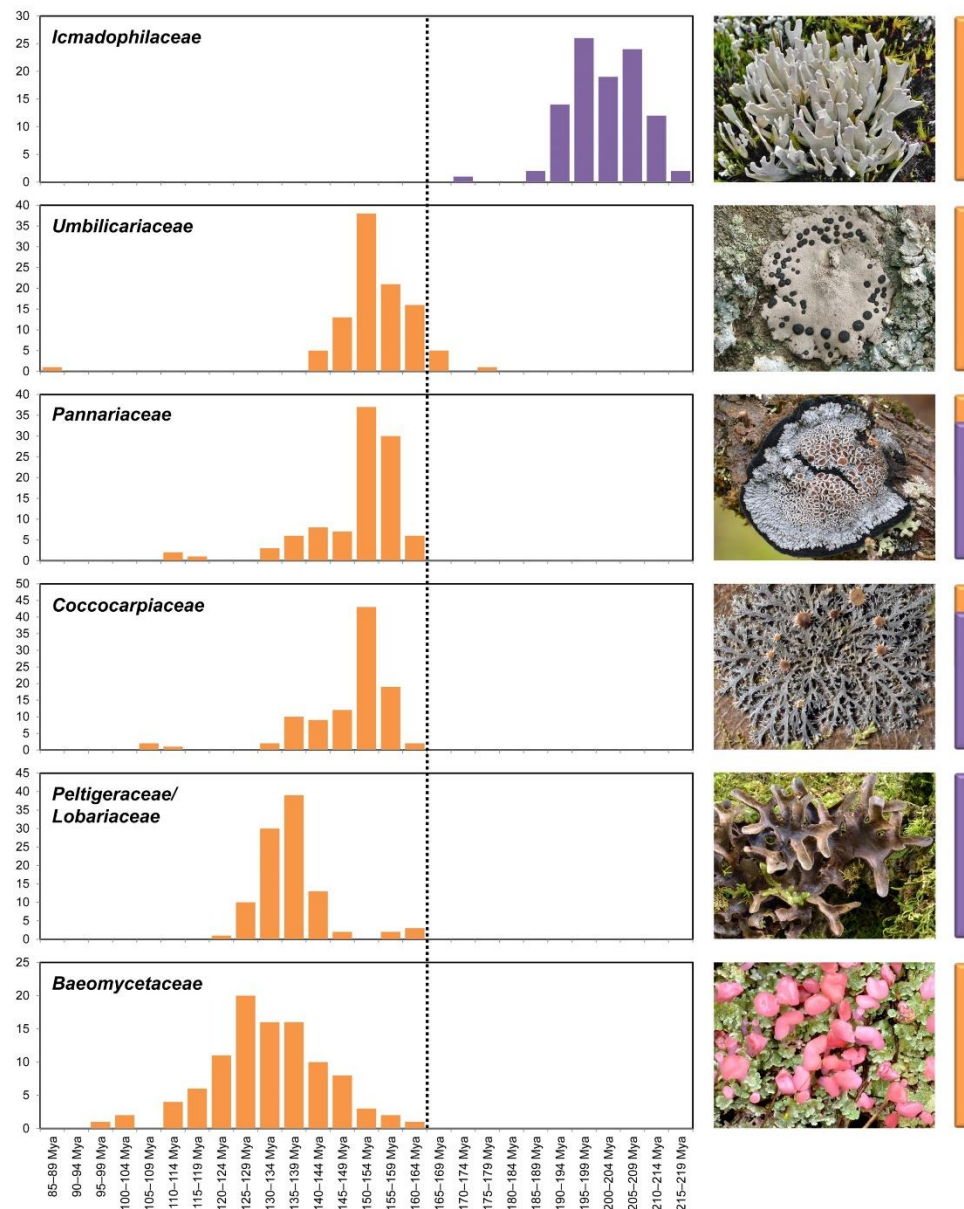

**Fig. 4. Distribution of inferred divergence times for the oldest extant macrolichen families** (based on *Nelsen et al., 2020*). The external morphology of selected representatives of each family is depicted to the right. The dotted line indicates the temporal placement of the *Daohugouthallus ciliiferus* fossil. The first three families are likely as old or older than the fossil but do not fit morphologically and/or ecologically. The best morphological and ecological fit are Peltigeraceae, in particular lobarioid lineages, but that family is significantly younger.



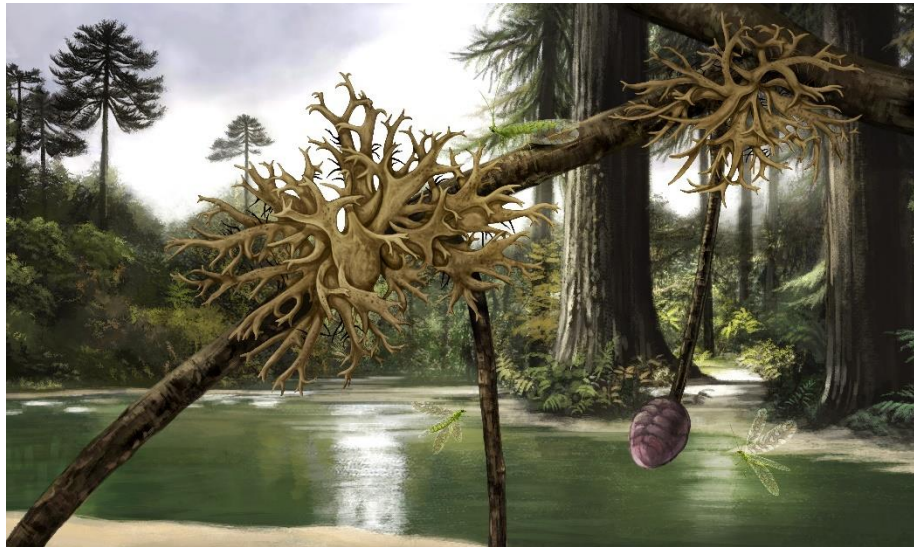

579

580 **Fig. 5. Habitus reconstruction of the lichen *Daohugouthallus ciliiferus* growing on**  
 581 **gymnosperm branches. Drawing by Xiaoran Zuo.**
