# Supplementary material for: New insights into the earlier evolutionary history of epiphytic macrolichens
Source: bioRxiv or medRxiv preprint supplement (doi:10.1101/2021.08.02.454570), 2021-08-03
Supplement: Supplementary file [file media-1.pdf]

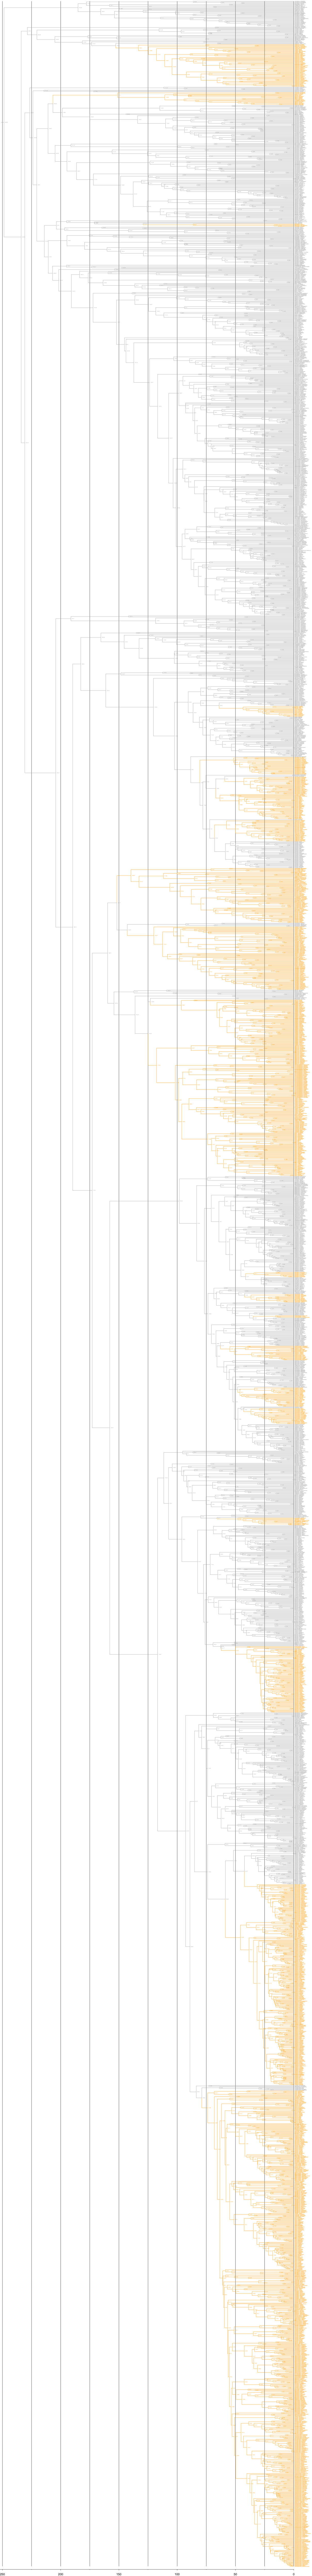

**Fig. S1.** Detailed time-calibrated ML phylogeny of 3,373 Lecanoromycetes fungi (based on *Nelsen et al., 2020*). Macrolichen lineages are indicated in orange.

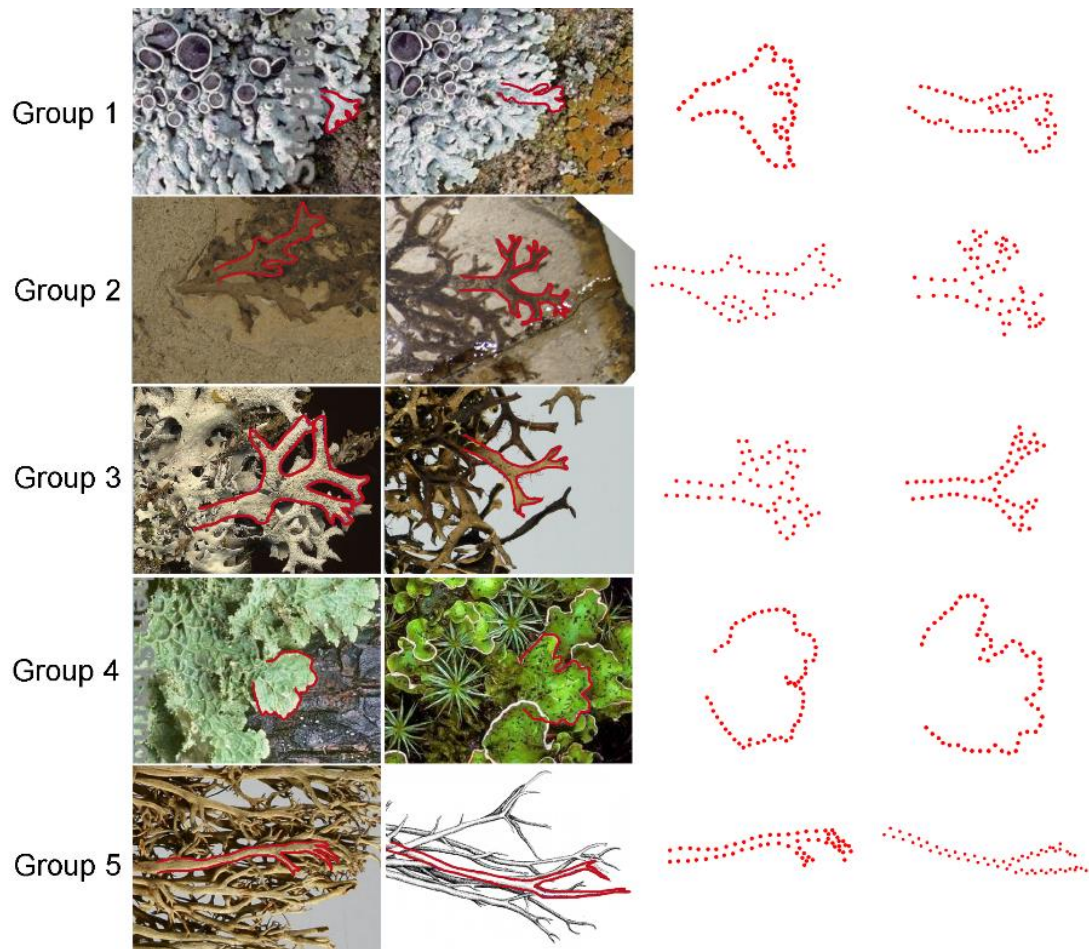

**Fig. S2.** Description of the curves used in the geometric morphometric analysis. The curves of lobes or branches of the five groups (small branches group, *Daohugouthallus ciliiferus* fossil group, long branches group, wide lobes foliose group and fruticose group) shown in columns 1 and 2 are outlined in red color, then they were resampled in 60 semi-landmarks represented by red points shown in columns 3 and 4.

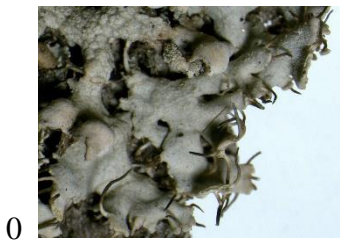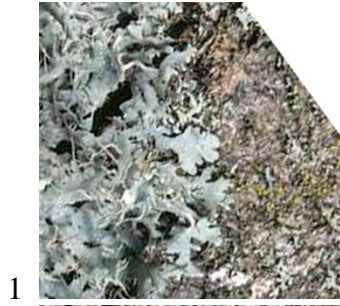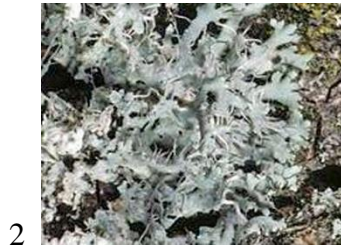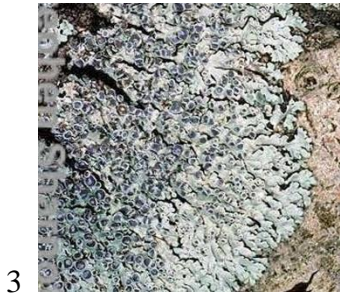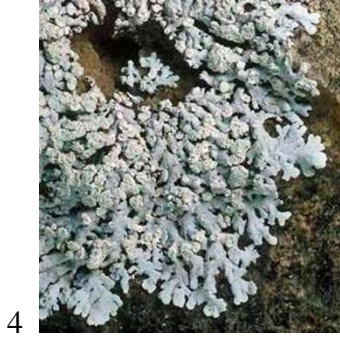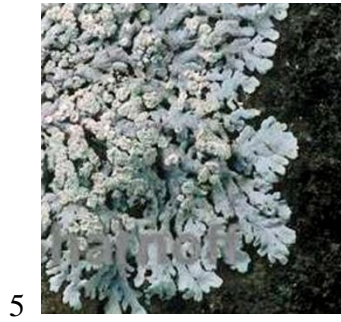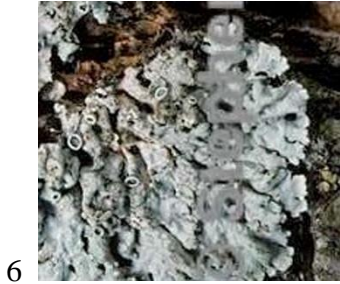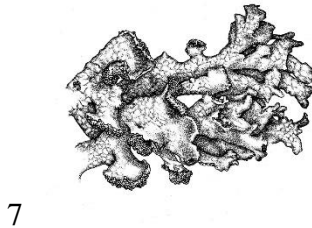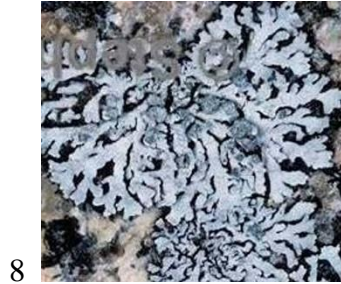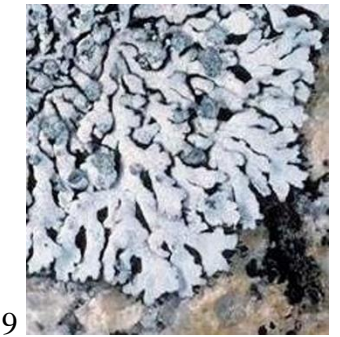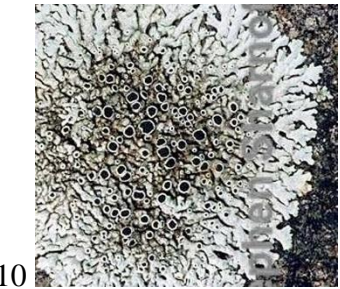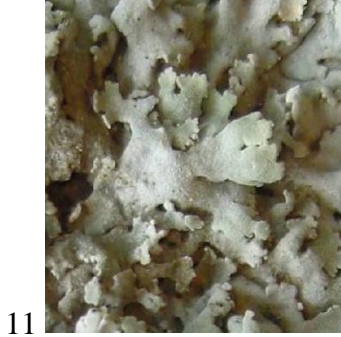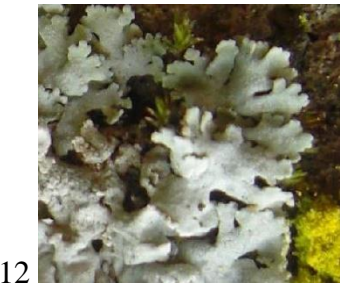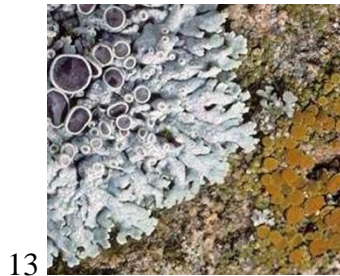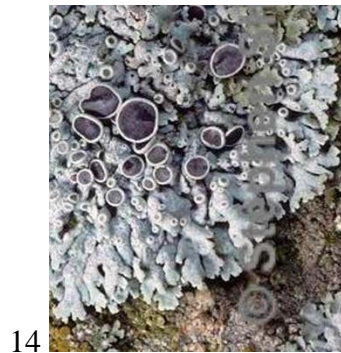

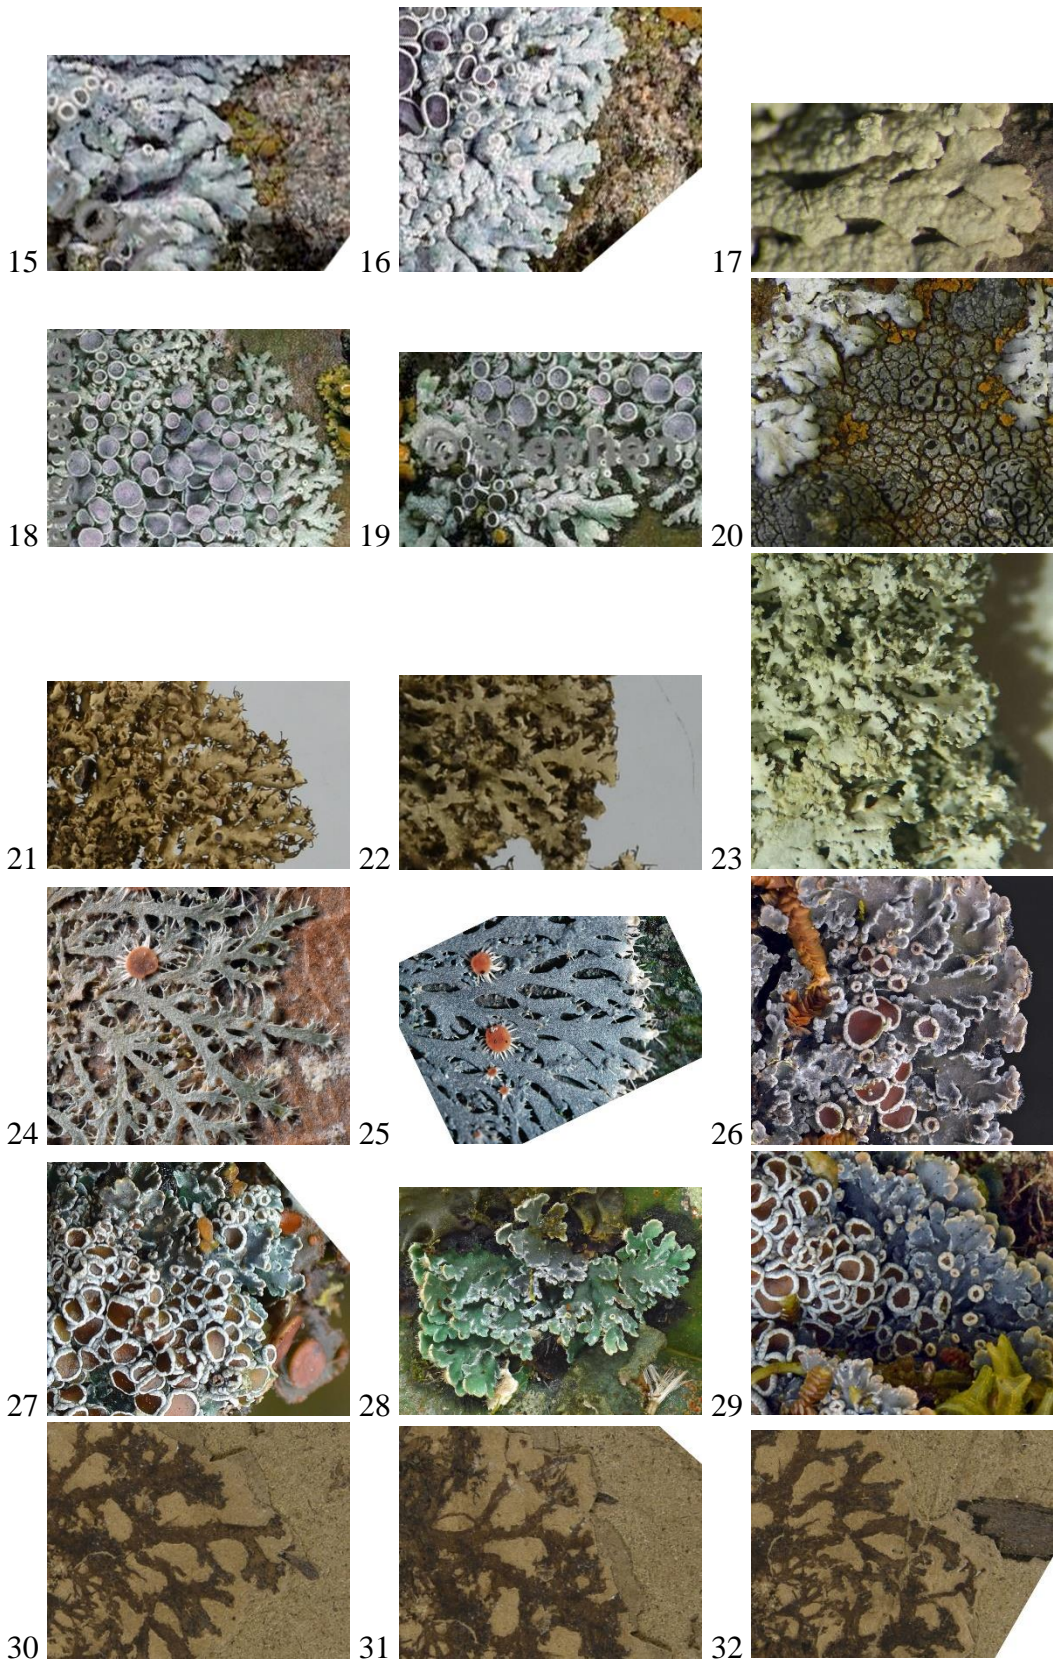

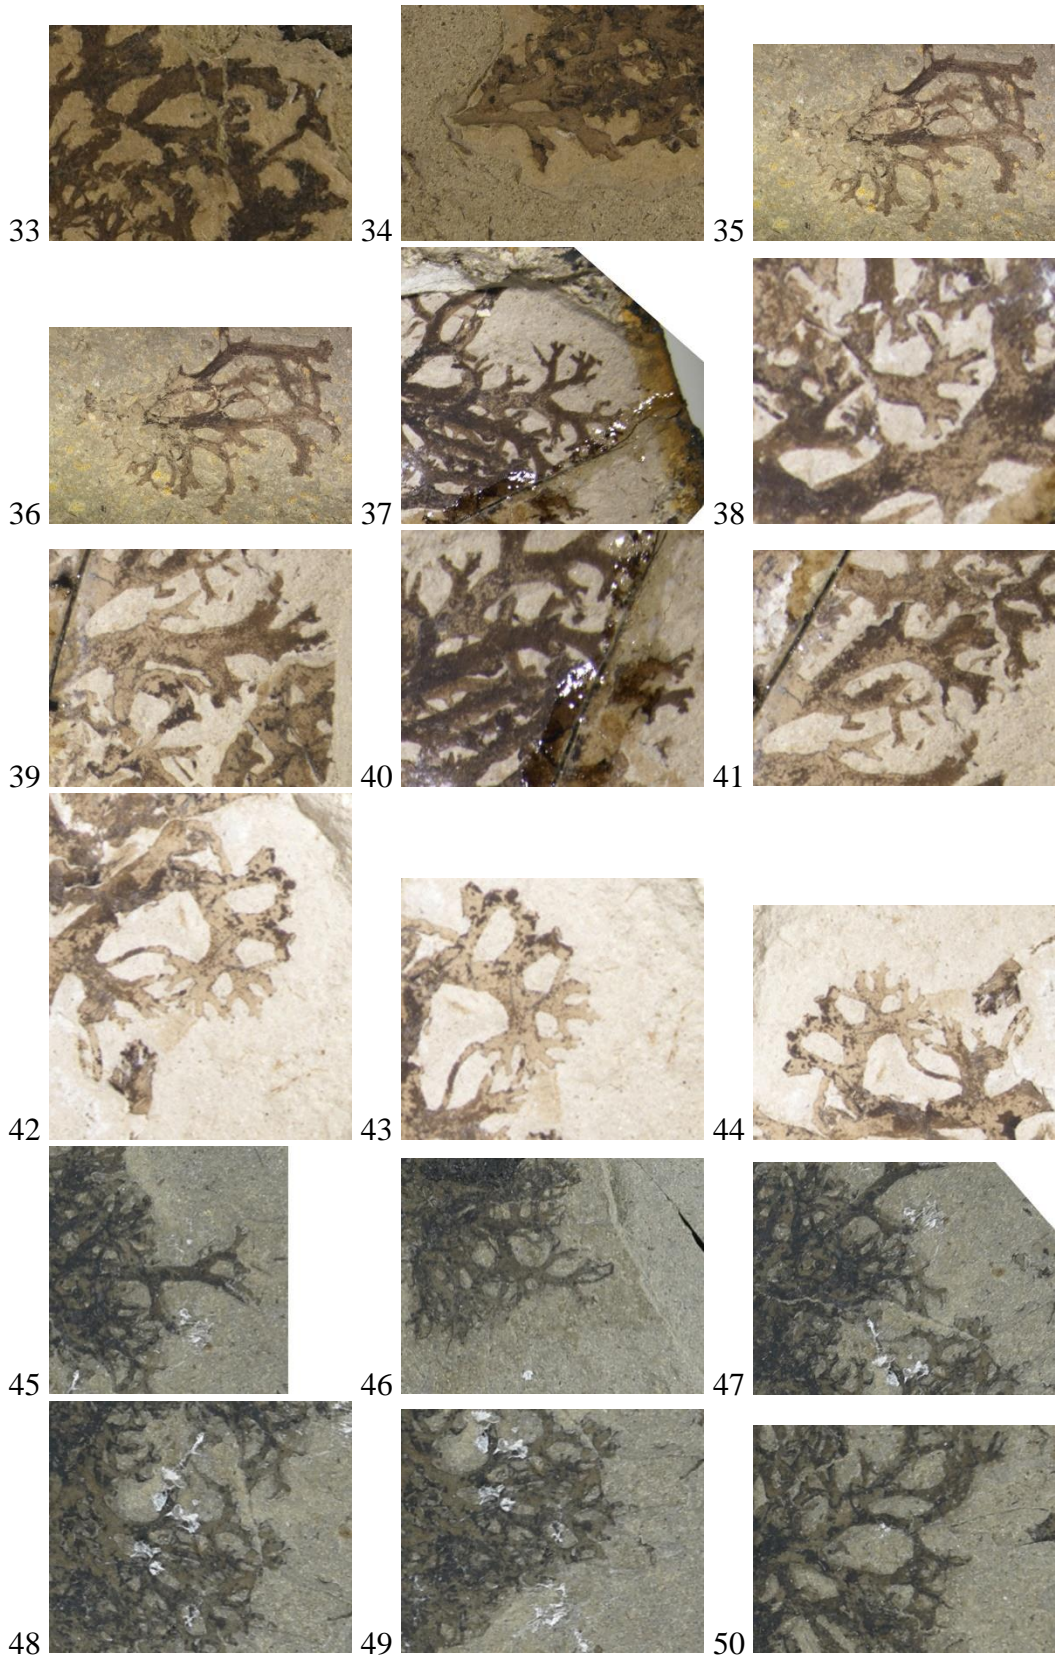

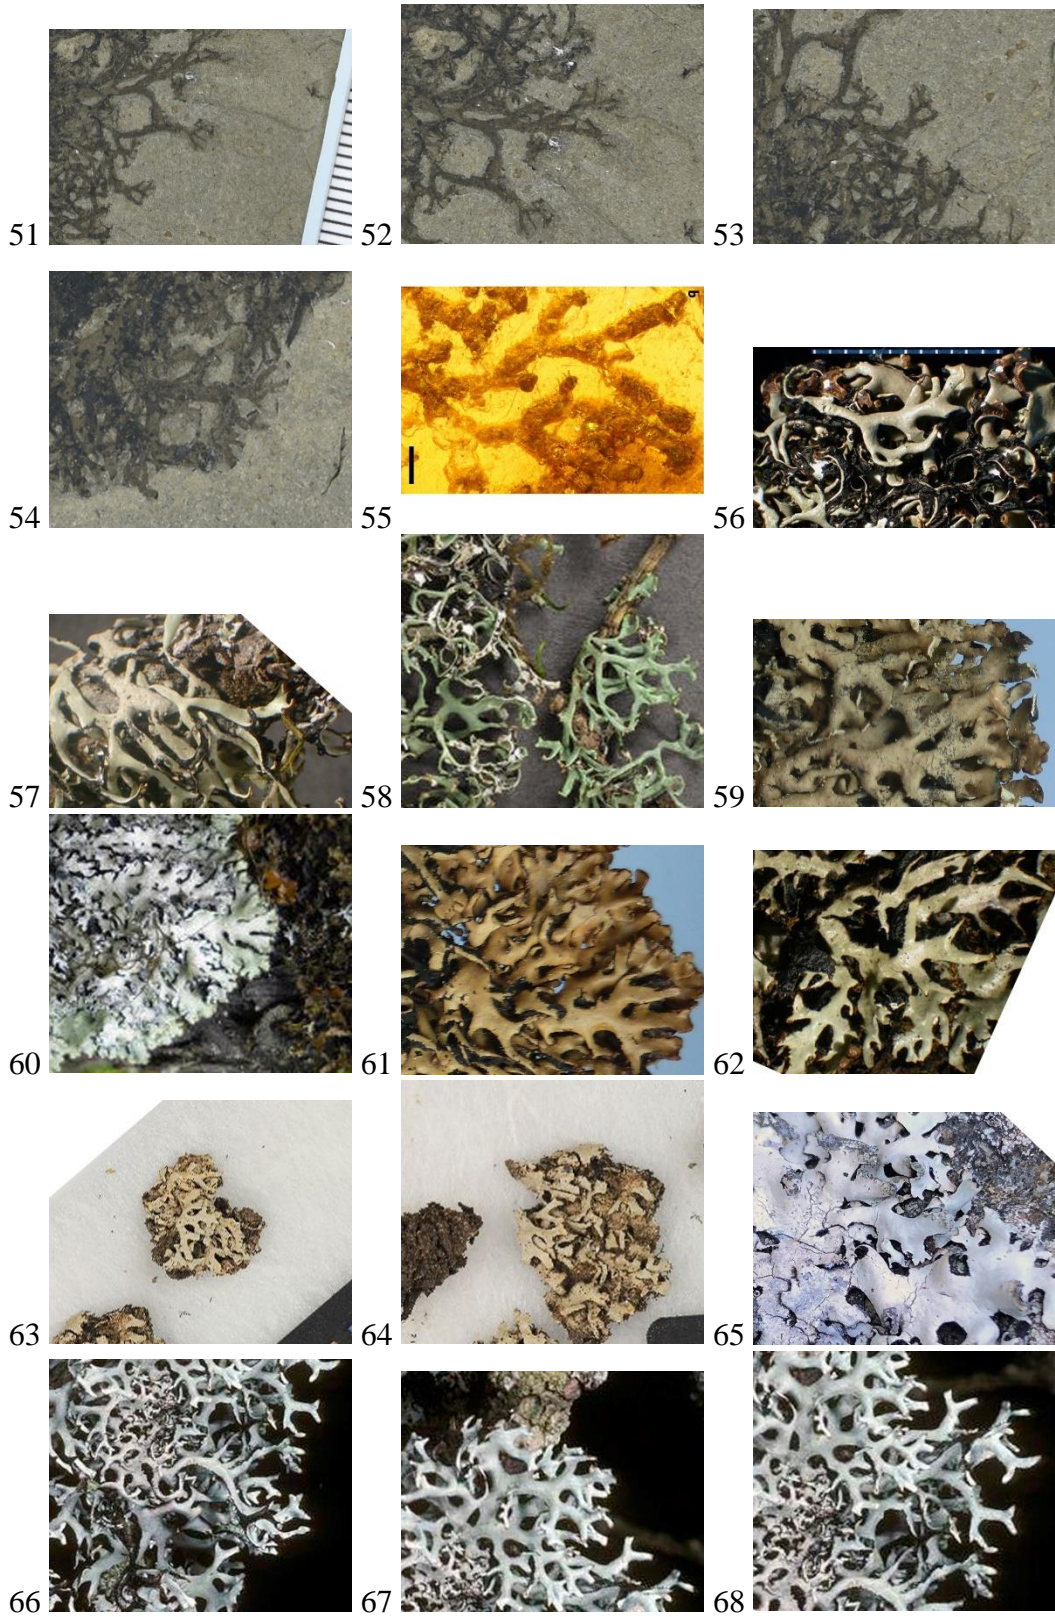

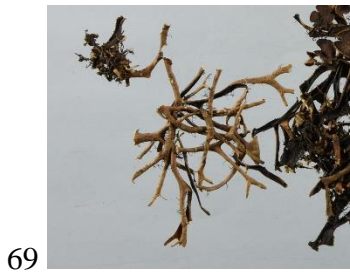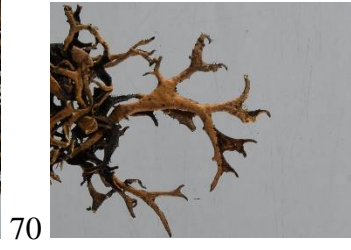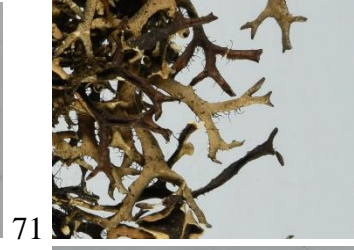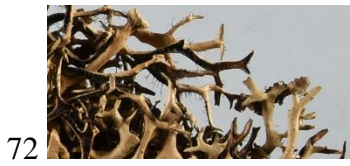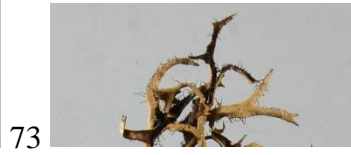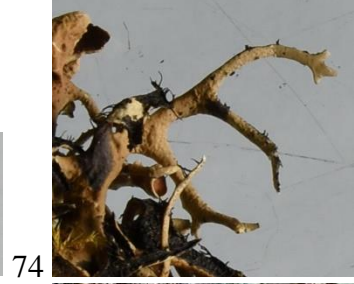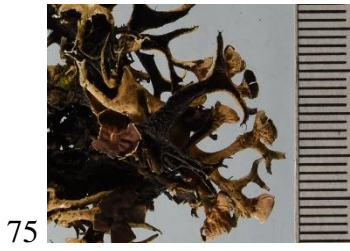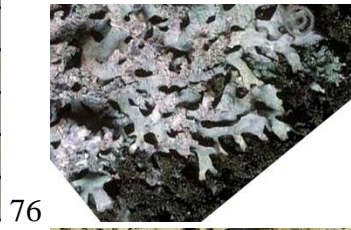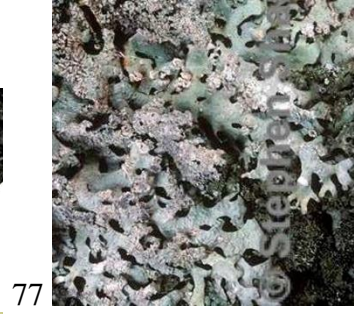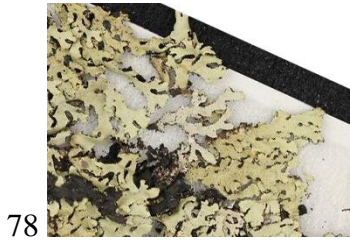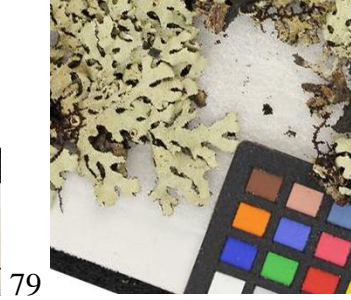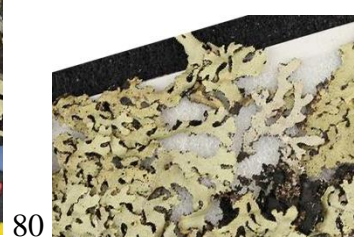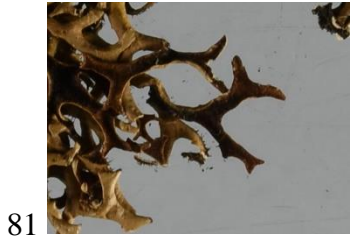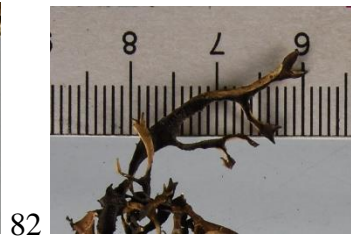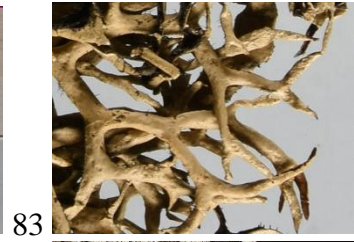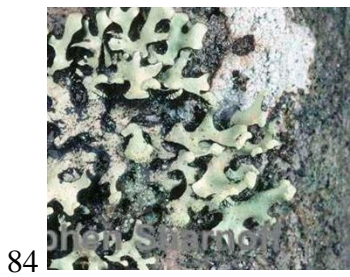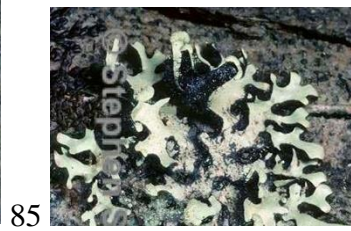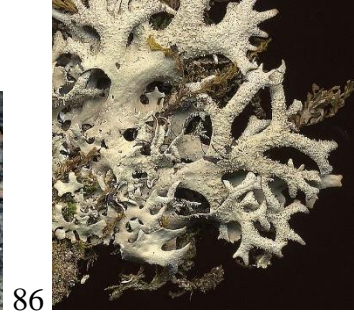



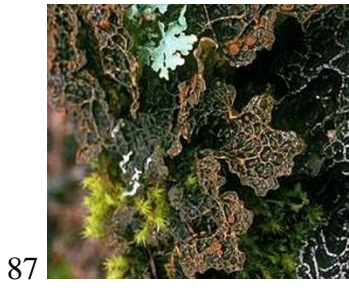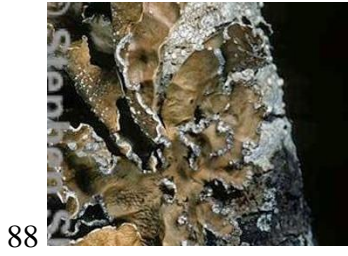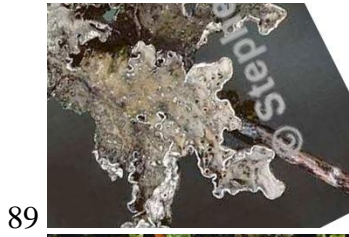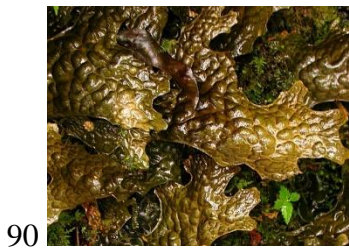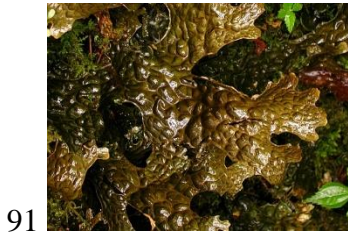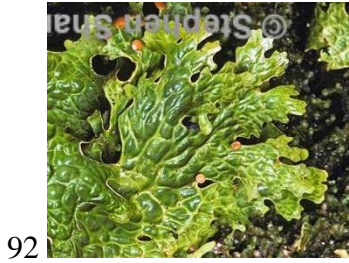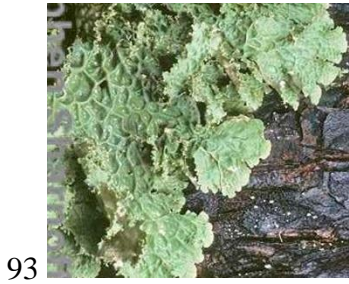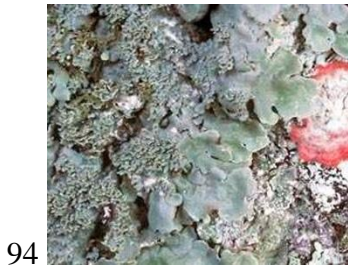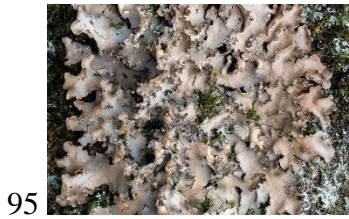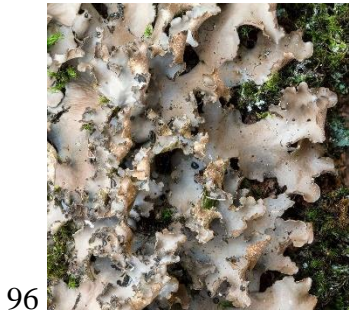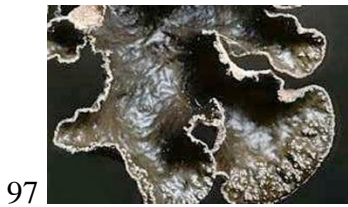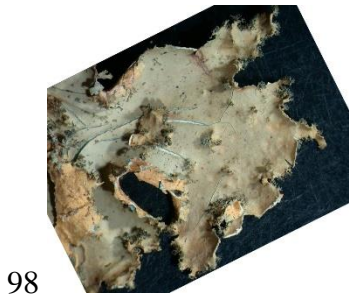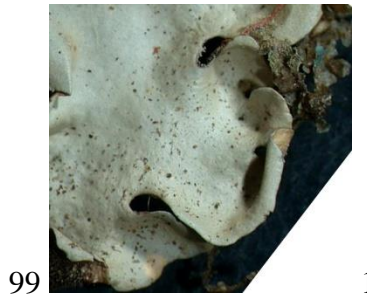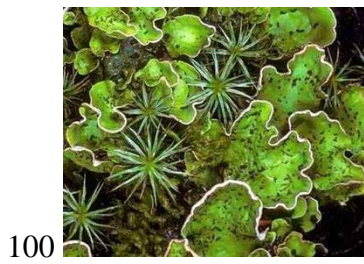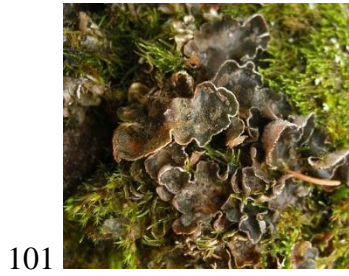

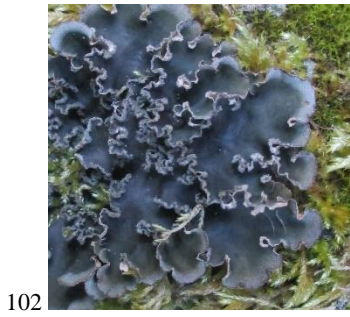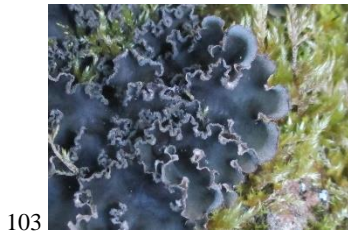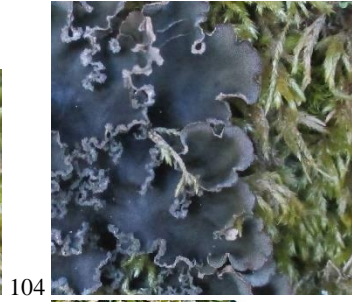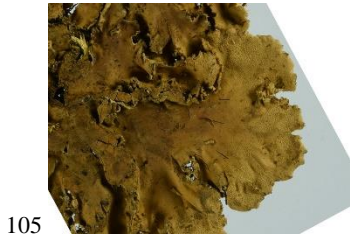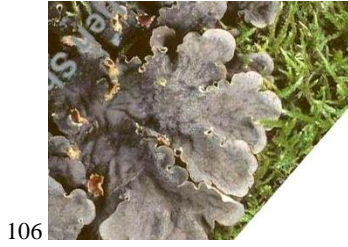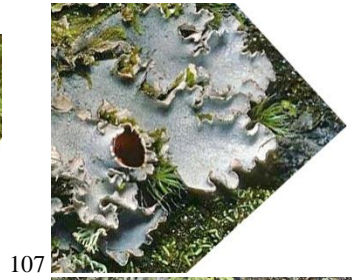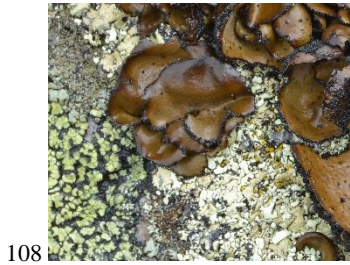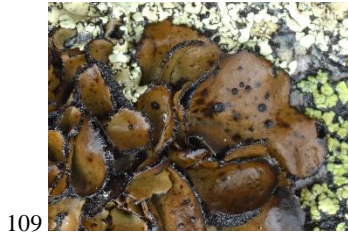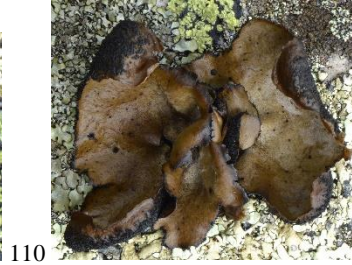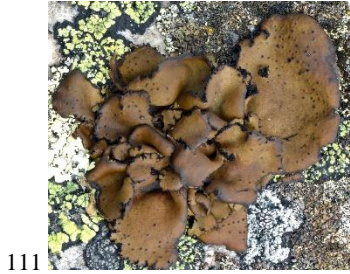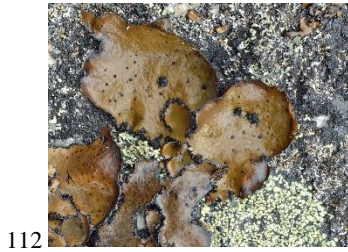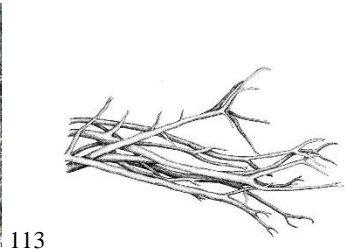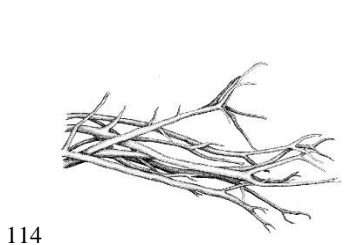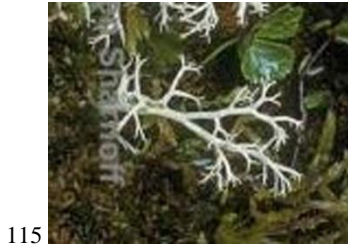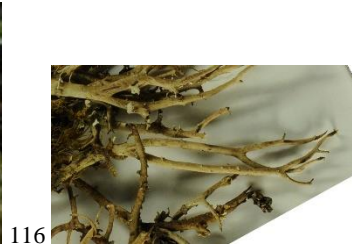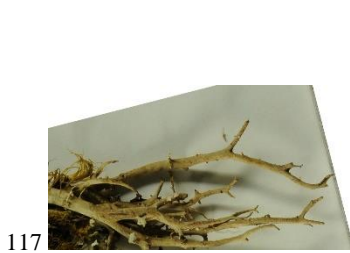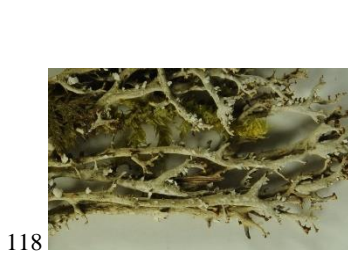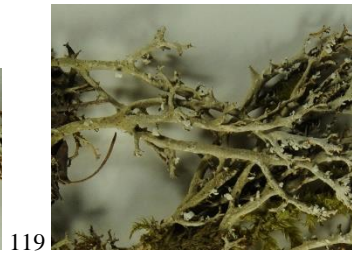

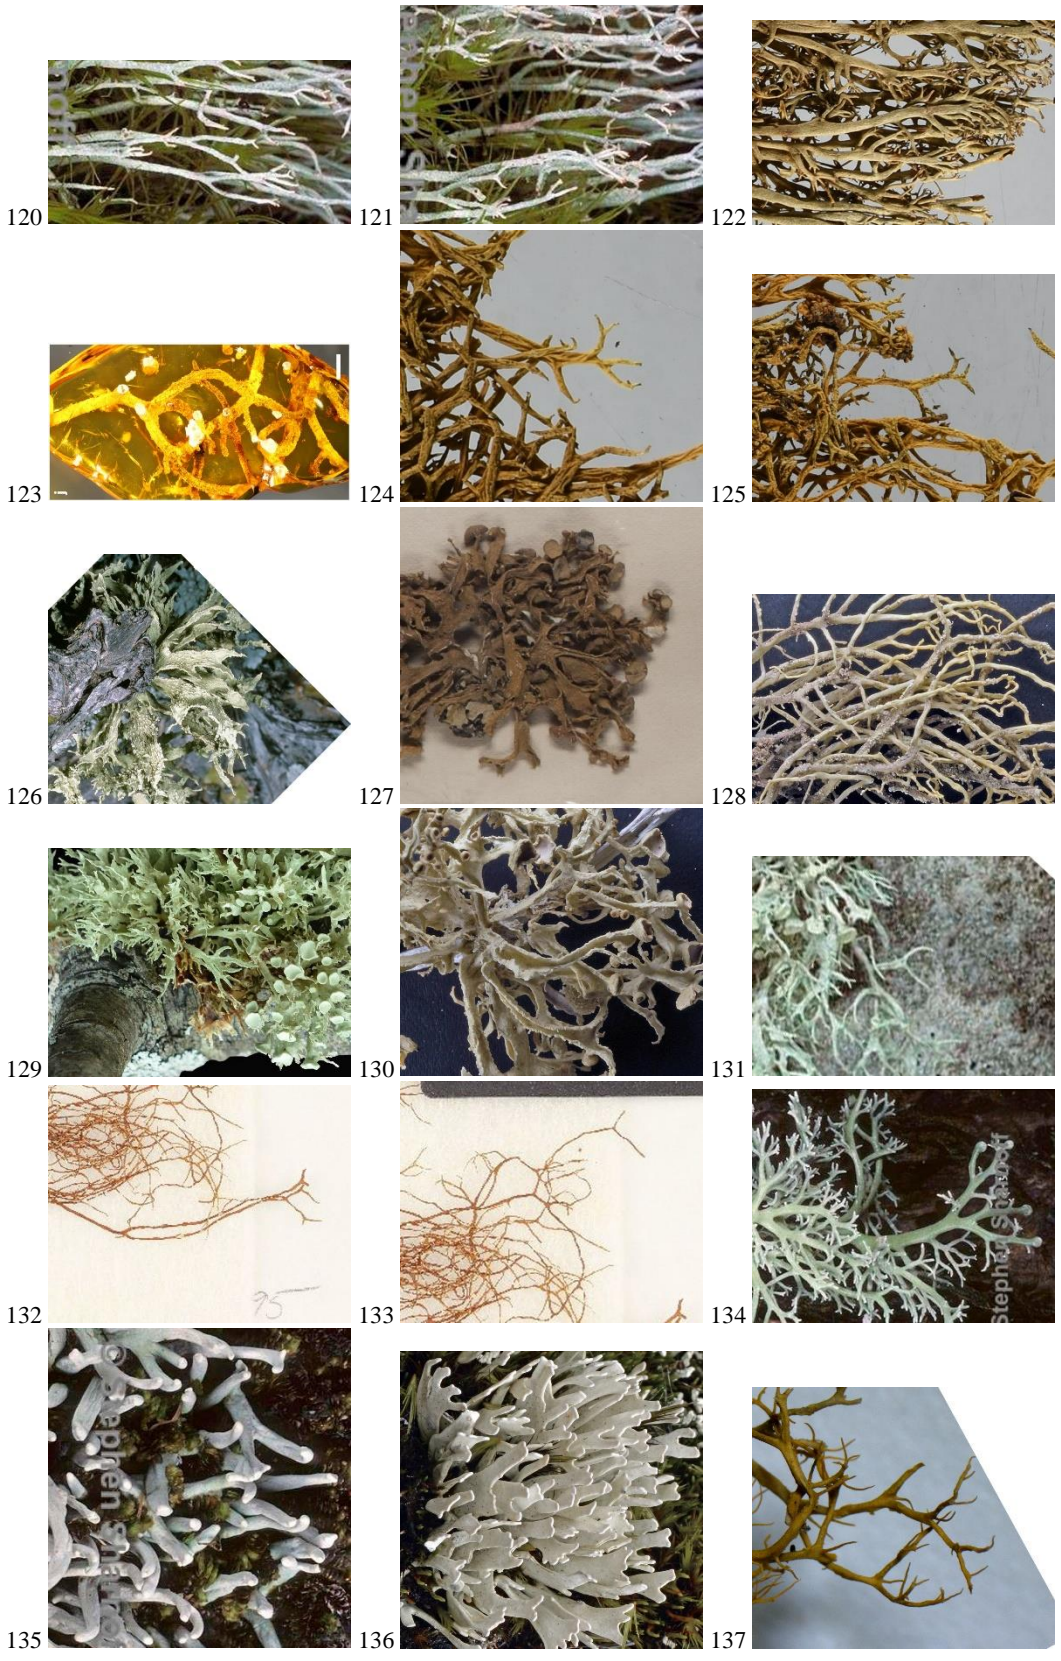

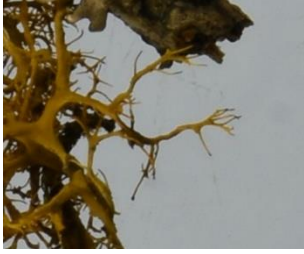

138

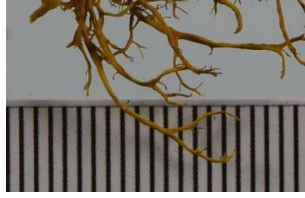

139

**Fig. S3.** The 140 images of five groups, i.e. microfoliose group, the *Daohugouthallus ciliiferus* fossil group, a long branches group, a wide-lobed group, and a fruticose group, used for geometric morphometric analysis and the order number in front of the image corresponds to the ID in Table S3.

**Table S1.** The photos information of 61 representative extant species and two fossil species in different orders of Lecanoromycetes used in the geometric morphometrics analysis

| Sample information                         | Species                             | Family       | Order       |
|--------------------------------------------|-------------------------------------|--------------|-------------|
| CNALH Image Library (2 photo)              | <i>Cladonia amaurocraea</i>         | Cladoniaceae | Lecanorales |
| CNALH Image Library (1 photo)              | <i>Cl. arbuscula</i>                | Cladoniaceae | Lecanorales |
| HMAS-L 7879, Hubei, China (2 photos)       | <i>Cl. furcata</i>                  | Cladoniaceae | Lecanorales |
| HMAS-L 122801, Jilin, China (2 photos)     | <i>Cl. furcata</i>                  | Cladoniaceae | Lecanorales |
| CNALH Image Library (2 photos)             | <i>Cl. furcata</i>                  | Cladoniaceae | Lecanorales |
| HMAS-L 120346, Shaanxi, China              | <i>Cl. rangiferina</i>              | Cladoniaceae | Lecanorales |
| HMAS-L 9403, Heilongjiang, China           | <i>Evernia esorediosa</i>           | Parmeliaceae | Lecanorales |
| HMAS-L 9405, Inner Mongolia, China         | <i>E. esorediosa</i>                | Parmeliaceae | Lecanorales |
| CNALH Image Library (2 photos)             | <i>Hypotrachyna alectorialiorum</i> | Parmeliaceae | Lecanorales |
| CNALH Image Library (1 photos)             | <i>H. britannica</i>                | Parmeliaceae | Lecanorales |
| CNALH Image Library (3 photos)             | <i>H. catawbiense</i>               | Parmeliaceae | Lecanorales |
| HMAS-L 8322, Yunnan, China                 | <i>H. cirrhatum</i>                 | Parmeliaceae | Lecanorales |
| HMAS-L 8295, Guizhou, China                | <i>H. cirrhatum</i>                 | Parmeliaceae | Lecanorales |
| HMAS-L 8319, Tibet, China                  | <i>H. cirrhatum</i>                 | Parmeliaceae | Lecanorales |
| HMAS-L 8339, Yunnan, China                 | <i>H. cirrhatum</i>                 | Parmeliaceae | Lecanorales |
| HMAS-L 22474, Yunnan, China                | <i>H. cirrhatum</i>                 | Parmeliaceae | Lecanorales |
| HMAS-L 113576, Yunnan, China(2 photos)     | <i>H. cirrhatum</i>                 | Parmeliaceae | Lecanorales |
| CNALH Image Library (2 photos)             | <i>H. croceopustulata</i>           | Parmeliaceae | Lecanorales |
| CNALH Image Library (3 photos)             | <i>H. goiasii</i>                   | Parmeliaceae | Lecanorales |
| HMAS-L 8085, Yunnan, China                 | <i>H. nepalense</i>                 | Parmeliaceae | Lecanorales |
| HMAS-L 8269, Tibet, China                  | <i>H. rhizodendroideum</i>          | Parmeliaceae | Lecanorales |
| HMAS-L 80658, Yunnan, China                | <i>H. rhizodendroideum</i>          | Parmeliaceae | Lecanorales |
| CNALH Image Library (2 photos)             | <i>H. sinuosa</i>                   | Parmeliaceae | Lecanorales |
| CNALH Image Library (1 photos)             | <i>H. vexans</i>                    | Parmeliaceae | Lecanorales |
| 24855, <i>Hypogymnia</i> Media Gallery     | <i>Hypogymnia arcuata</i>           | Parmeliaceae | Lecanorales |
| 31157, <i>Hypogymnia</i> Media Gallery     | <i>H. fragillima</i>                | Parmeliaceae | Lecanorales |
| dor-124_1, <i>Hypogymnia</i> Media Gallery | <i>H. fragillima</i>                | Parmeliaceae | Lecanorales |
| 31296, <i>Hypogymnia</i> Media Gallery     | <i>H. physodes</i>                  | Parmeliaceae | Lecanorales |
| HMAS-L 81529, Xinjiang, China              | <i>H. physodes</i>                  | Parmeliaceae | Lecanorales |
| HMAS-L 81350, Inner Mongolia, China        | <i>H. vittata</i>                   | Parmeliaceae | Lecanorales |
| 25623, <i>Hypogymnia</i> Media Gallery     | <i>H. vittata</i>                   | Parmeliaceae | Lecanorales |
| GZG_BST_21949 (fossil)                     | -                                   | Parmeliaceae | Lecanorales |

|                                                          |                                            |                 |              |
|----------------------------------------------------------|--------------------------------------------|-----------------|--------------|
| BitterfeldJörg Wunderlich Amber Collection F781 (fossil) | -                                          | Parmeliaceae    | Lecanorales  |
| CNALH Image Library (2 photos)                           | <i>Lobaria anomala</i>                     | Lobariaceae     | Peltigerales |
| CNALH Image Library (1 photos)                           | <i>L. hallii</i>                           | Lobariaceae     | Peltigerales |
| CNALH Image Library (2 photos)                           | <i>L. kurokawae</i>                        | Lobariaceae     | Peltigerales |
| CNALH Image Library (1 photos)                           | <i>L. linita</i>                           | Lobariaceae     | Peltigerales |
| CNALH Image Library (1 photos)                           | <i>L. oregana</i>                          | Lobariaceae     | Peltigerales |
| CNALH Image Library (1 photos)                           | <i>L. tenuis</i>                           | Lobariaceae     | Peltigerales |
| CNALH Image Library (1 photos)                           | <i>Peltigera aphthosa</i>                  | Peltigeraceae   | Peltigerales |
| CNALH Image Library (1 photos)                           | <i>P. castanea</i>                         | Peltigeraceae   | Peltigerales |
| CNALH Image Library (3 photos)                           | <i>P. collina</i>                          | Peltigeraceae   | Peltigerales |
| HMAS-L 13030, Inner Mongolia, China                      | <i>P. praetextata</i>                      | Peltigeraceae   | Peltigerales |
| CNALH Image Library (1 photo)                            | <i>P. praetextata</i>                      | Peltigeraceae   | Peltigerales |
| CNALH Image Library (1 photo)                            | <i>P. rufescens</i>                        | Peltigeraceae   | Peltigerales |
| Colombia, Lucking sn_2766 (1 photo)                      | <i>Pannaria rubiginosa</i>                 | Pannariaceae    | Peltigerales |
| Colombia, Lucking sn_2355 (1 photo)                      | <i>Pannaria rubiginosa</i>                 | Pannariaceae    | Peltigerales |
| Colombia, Lucking sn_2719 (1 photo)                      | <i>Pannaria rubiginosa</i>                 | Pannariaceae    | Peltigerales |
| Colombia, Lucking 41024a_4802 (1 photo)                  | <i>Pannaria rubiginosa</i>                 | Pannariaceae    | Peltigerales |
| Colombia, Marin1648_6790 (1 photo)                       | <i>Coccocarpia stellata</i>                | Coccocarpiaceae | Peltigerales |
| Costa Rica, Lucking (1 photo)                            | <i>Coccocarpia stellata</i>                | Coccocarpiaceae | Peltigerales |
| HMAS-L 129385, Inner Mongolia, China                     | <i>Physcia adscendens</i>                  | Physciaceae     | Caliciales   |
| CNALH Image Library (2 photos)                           | <i>P. adscendens</i>                       | Physciaceae     | Caliciales   |
| CNALH Image Library (1 photos)                           | <i>P. aipolia</i>                          | Physciaceae     | Caliciales   |
| CNALH Image Library (2 photos)                           | <i>P. americana</i>                        | Physciaceae     | Caliciales   |
| CNALH Image Library (1 photos)                           | <i>P. biziana</i>                          | Physciaceae     | Caliciales   |
| CNALH Image Library (3 photos)                           | <i>P. caesia</i>                           | Physciaceae     | Caliciales   |
| CNALH Image Library (1 photos)                           | <i>P. halei</i>                            | Physciaceae     | Caliciales   |
| CNALH Image Library (2 photos)                           | <i>P. magnussonii</i>                      | Physciaceae     | Caliciales   |
| CNALH Image Library (4 photos)                           | <i>P. phaea</i>                            | Physciaceae     | Caliciales   |
| CNALH Image Library (1 photos)                           | <i>P. rolfii</i>                           | Physciaceae     | Caliciales   |
| CNALH Image Library (2 photos)                           | <i>P. stellaris</i>                        | Physciaceae     | Caliciales   |
| CNALH Image Library (1 photos)                           | <i>P. subalbinea</i>                       | Physciaceae     | Caliciales   |
| HMAS-L 110982, Xinjiang, China                           | <i>P. tenella</i>                          | Physciaceae     | Caliciales   |
| HMAS-L 110984, Xinjiang, China                           | <i>P. tenella</i>                          | Physciaceae     | Caliciales   |
| CNALH Image Library (1 photos)                           | <i>P. thomsoniana</i>                      | Physciaceae     | Caliciales   |
| CNALH Image Library (1 photos)                           | <i>Ramalina bajacalifornica</i>            | Ramalinaceae    | Lecanorales  |
| CNALH Image Library (1 photos)                           | <i>R. calicaris</i> var. <i>fastigiata</i> | Ramalinaceae    | Lecanorales  |
| CNALH Image Library (1 photos)                           | <i>R. camptospora</i>                      | Ramalinaceae    | Lecanorales  |

|                                        |                                             |                  |                |
|----------------------------------------|---------------------------------------------|------------------|----------------|
| CNALH Image Library (1 photos)         | <i>R. culbersoniorum</i>                    | Ramalinaceae     | Lecanorales    |
| CNALH Image Library (1 photos)         | <i>R. darwiniana</i> var. <i>darwiniana</i> | Ramalinaceae     | Lecanorales    |
| CNALH Image Library (1 photos)         | <i>R. dilacerata</i>                        | Ramalinaceae     | Lecanorales    |
| CNALH Image Library (2 photos)         | <i>R. pacifica</i>                          | Ramalinaceae     | Lecanorales    |
| CNALH Image Library (1 photo)          | <i>Sphaerophorus globosus</i>               | Sphaerophoraceae | Lecanorales    |
| CNALH Image Library (2 photos)         | <i>Sticta beauvoisii</i>                    | Lobariaceae      | Peltigerales   |
| CNALH Image Library (1 photos)         | <i>S. limbata</i>                           | Lobariaceae      | Peltigerales   |
| CNALH Image Library (1 photos)         | <i>S. plumbicolor</i>                       | Lobariaceae      | Peltigerales   |
| CNALH Image Library (1 photos)         | <i>S. xanthotropa</i>                       | Lobariaceae      | Peltigerales   |
| CNALH Image Library (1 photos)         | <i>Siphula ceratites</i>                    | Icmadophilaceae  | Pertusariales  |
| Colombia, Lucking sn_9412 (1 photo)    | <i>S. pteruloides</i>                       | Icmadophilaceae  | Pertusariales  |
| HMAS-L 504, Heilongjiang, China        | <i>Teloschistes flavicans</i>               | Teloschistaceae  | Teloschistales |
| HMAS-L 104547, Hubei, China            | <i>T. flavicans</i>                         | Teloschistaceae  | Teloschistales |
| HMAS-L 104536, Sichuan, China          | <i>T. flavicans</i>                         | Teloschistaceae  | Teloschistales |
| Colombia, Lucking 41014_4736 (1 photo) | <i>Umbilicaria polyphylla</i>               | Umbilicariaceae  | Umbilicariales |
| Colombia, Lucking 41014_4737 (1 photo) | <i>Umbilicaria polyphylla</i>               | Umbilicariaceae  | Umbilicariales |
| Colombia, Lucking 41014_4738 (1 photo) | <i>Umbilicaria polyphylla</i>               | Umbilicariaceae  | Umbilicariales |
| Colombia, Lucking 41014_4739 (1 photo) | <i>Umbilicaria polyphylla</i>               | Umbilicariaceae  | Umbilicariales |
| Colombia, Lucking 41014_4743 (1 photo) | <i>Umbilicaria polyphylla</i>               | Umbilicariaceae  | Umbilicariales |

**Table S2.** The geometric morphometric analysis resulted in the variance and cumulative values for all the principal components

| Principal component | Eigenvalues       | Variance%     | Cumulative %  |
|---------------------|-------------------|---------------|---------------|
| <b>1</b>            | <b>0.03200622</b> | <b>24.376</b> | <b>24.376</b> |
| <b>2</b>            | <b>0.02319641</b> | <b>17.666</b> | <b>42.042</b> |
| <b>3</b>            | <b>0.01454791</b> | <b>11.079</b> | <b>53.121</b> |
| <b>4</b>            | <b>0.01046854</b> | <b>7.973</b>  | <b>61.094</b> |
| 5                   | 0.0073343         | 5.586         | 66.679        |
| 6                   | 0.006             | 4.57          | 71.249        |
| 7                   | 0.00472941        | 3.602         | 74.851        |
| 8                   | 0.00444899        | 3.388         | 78.239        |
| 9                   | 0.00338804        | 2.58          | 80.819        |
| 10                  | 0.00291705        | 2.222         | 83.041        |
| 11                  | 0.00246823        | 1.88          | 84.921        |
| 12                  | 0.00222106        | 1.692         | 86.612        |
| 13                  | 0.0021387         | 1.629         | 88.241        |
| 14                  | 0.00177234        | 1.35          | 89.591        |
| 15                  | 0.00167563        | 1.276         | 90.867        |
| 16                  | 0.00148536        | 1.131         | 91.998        |
| 17                  | 0.00107806        | 0.821         | 92.819        |
| 18                  | 0.00100053        | 0.762         | 93.581        |
| 19                  | 0.00087003        | 0.663         | 94.244        |
| 20                  | 0.00070831        | 0.539         | 94.783        |
| 21                  | 0.00065028        | 0.495         | 95.279        |
| 22                  | 0.00060754        | 0.463         | 95.741        |
| 23                  | 0.00051279        | 0.391         | 96.132        |
| 24                  | 0.00046675        | 0.355         | 96.487        |
| 25                  | 0.00043885        | 0.334         | 96.821        |
| 26                  | 0.00042747        | 0.326         | 97.147        |
| 27                  | 0.00034762        | 0.265         | 97.412        |
| 28                  | 0.00029405        | 0.224         | 97.636        |
| 29                  | 0.00026663        | 0.203         | 97.839        |
| 30                  | 0.00024143        | 0.184         | 98.023        |
| 31                  | 0.00020254        | 0.154         | 98.177        |
| 32                  | 0.00019285        | 0.147         | 98.324        |
| 33                  | 0.00018533        | 0.141         | 98.465        |
| 34                  | 0.00016945        | 0.129         | 98.594        |
| 35                  | 0.0001465         | 0.112         | 98.706        |
| 36                  | 0.00013846        | 0.105         | 98.811        |
| 37                  | 0.00012771        | 0.097         | 98.908        |
| 38                  | 0.00011912        | 0.091         | 98.999        |
| 39                  | 0.0001087         | 0.083         | 99.082        |
| 40                  | 0.00010072        | 0.077         | 99.158        |
| 41                  | 0.00008652        | 0.066         | 99.224        |
| 42                  | 0.00008538        | 0.065         | 99.289        |



---

|    |            |       |        |
|----|------------|-------|--------|
| 43 | 0.00007168 | 0.055 | 99.344 |
| 44 | 0.00006718 | 0.051 | 99.395 |
| 45 | 0.00005783 | 0.044 | 99.439 |
| 46 | 0.00005578 | 0.042 | 99.482 |
| 47 | 0.00004892 | 0.037 | 99.519 |
| 48 | 0.00004683 | 0.036 | 99.555 |
| 49 | 0.00004168 | 0.032 | 99.586 |
| 50 | 0.00003921 | 0.03  | 99.616 |
| 51 | 0.00003592 | 0.027 | 99.644 |
| 52 | 0.00003432 | 0.026 | 99.67  |
| 53 | 0.00003169 | 0.024 | 99.694 |
| 54 | 0.00002899 | 0.022 | 99.716 |
| 55 | 0.00002772 | 0.021 | 99.737 |
| 56 | 0.00002557 | 0.019 | 99.756 |
| 57 | 0.00002491 | 0.019 | 99.775 |
| 58 | 0.0000216  | 0.016 | 99.792 |
| 59 | 0.00002129 | 0.016 | 99.808 |
| 60 | 0.00001817 | 0.014 | 99.822 |
| 61 | 0.00001739 | 0.013 | 99.835 |
| 62 | 0.00001461 | 0.011 | 99.846 |
| 63 | 0.00001424 | 0.011 | 99.857 |
| 64 | 0.00001318 | 0.01  | 99.867 |
| 65 | 0.00001241 | 0.009 | 99.877 |
| 66 | 0.00001202 | 0.009 | 99.886 |
| 67 | 0.00001102 | 0.008 | 99.894 |
| 68 | 0.00001024 | 0.008 | 99.902 |
| 69 | 0.00000998 | 0.008 | 99.91  |
| 70 | 0.00000892 | 0.007 | 99.916 |
| 71 | 0.00000794 | 0.006 | 99.922 |
| 72 | 0.00000741 | 0.006 | 99.928 |
| 73 | 0.00000727 | 0.006 | 99.934 |
| 74 | 0.00000635 | 0.005 | 99.938 |
| 75 | 0.00000598 | 0.005 | 99.943 |
| 76 | 0.00000591 | 0.005 | 99.948 |
| 77 | 0.00000553 | 0.004 | 99.952 |
| 78 | 0.00000491 | 0.004 | 99.955 |
| 79 | 0.00000457 | 0.003 | 99.959 |
| 80 | 0.00000429 | 0.003 | 99.962 |
| 81 | 0.0000041  | 0.003 | 99.965 |
| 82 | 0.0000037  | 0.003 | 99.968 |
| 83 | 0.00000348 | 0.003 | 99.971 |
| 84 | 0.00000318 | 0.002 | 99.973 |
| 85 | 0.00000307 | 0.002 | 99.976 |
| 86 | 0.00000271 | 0.002 | 99.978 |
| 87 | 0.00000253 | 0.002 | 99.98  |
| 88 | 0.00000252 | 0.002 | 99.981 |

---

---

|     |            |       |        |
|-----|------------|-------|--------|
| 89  | 0.00000245 | 0.002 | 99.983 |
| 90  | 0.00000227 | 0.002 | 99.985 |
| 91  | 0.00000208 | 0.002 | 99.987 |
| 92  | 0.00000197 | 0.002 | 99.988 |
| 93  | 0.00000167 | 0.001 | 99.989 |
| 94  | 0.00000154 | 0.001 | 99.991 |
| 95  | 0.00000148 | 0.001 | 99.992 |
| 96  | 0.00000131 | 0.001 | 99.993 |
| 97  | 0.0000013  | 0.001 | 99.994 |
| 98  | 0.00000112 | 0.001 | 99.995 |
| 99  | 0.000001   | 0.001 | 99.995 |
| 100 | 0.00000085 | 0.001 | 99.996 |
| 101 | 0.00000074 | 0.001 | 99.997 |
| 102 | 0.0000006  | 0     | 99.997 |
| 103 | 0.00000057 | 0     | 99.997 |
| 104 | 0.00000054 | 0     | 99.998 |
| 105 | 0.00000053 | 0     | 99.998 |
| 106 | 0.00000041 | 0     | 99.999 |
| 107 | 0.00000038 | 0     | 99.999 |
| 108 | 0.00000032 | 0     | 99.999 |
| 109 | 0.0000003  | 0     | 99.999 |
| 110 | 0.00000021 | 0     | 99.999 |
| 111 | 0.00000019 | 0     | 100    |
| 112 | 0.00000019 | 0     | 100    |
| 113 | 0.00000014 | 0     | 100    |
| 114 | 0.00000012 | 0     | 100    |
| 115 | 0.00000005 | 0     | 100    |
| 116 | 0.00000003 | 0     | 100    |

---

**Table S3.** The data set of five groups divided according to thallus growth types used in the geometric morphometrics analysis

| ID | Photo name                                             | Group |
|----|--------------------------------------------------------|-------|
| 0  | FO-C-Phy- <i>Phycia adscendens</i> HMAS129385          | 1     |
| 1  | FO-C-Phy- <i>Phycia adscendens</i>                     | 1     |
| 2  | FO-C-Phy- <i>Phycia adscendens</i> -1                  | 1     |
| 3  | FO-C-Phy- <i>Phycia aipolia</i> _9                     | 1     |
| 4  | FO-C-Phy- <i>Phycia americana</i> _1                   | 1     |
| 5  | FO-C-Phy- <i>Phycia americana</i> _2                   | 1     |
| 6  | FO-C-Phy- <i>Phycia biziana</i> _9                     | 1     |
| 7  | FO-C-Phy- <i>Phycia caesia</i> -1                      | 1     |
| 8  | FO-C-Phy- <i>Phycia caesia</i> -2 - 1                  | 1     |
| 9  | FO-C-Phy- <i>Phycia caesia</i> -2                      | 1     |
| 10 | FO-C-Phy- <i>Phycia halei</i> _3                       | 1     |
| 11 | FO-C-Phy- <i>Phycia magnussonii</i>                    | 1     |
| 12 | FO-C-Phy- <i>Phycia magnussonii</i> -1                 | 1     |
| 13 | FO-C-Phy- <i>Phycia phaea</i> _poss                    | 1     |
| 14 | FO-C-Phy- <i>Phycia phaea</i> _poss-1                  | 1     |
| 15 | FO-C-Phy- <i>Phycia phaea</i> _poss-2                  | 1     |
| 16 | FO-C-Phy- <i>Phycia phaea</i> _poss-3                  | 1     |
| 17 | FO-C-Phy- <i>Phycia rolfii</i>                         | 1     |
| 18 | FO-C-Phy- <i>Phycia stellaris</i>                      | 1     |
| 19 | FO-C-Phy- <i>Phycia stellaris</i> -1                   | 1     |
| 20 | FO-C-Phy- <i>Phycia subalbinea</i> -1                  | 1     |
| 21 | FO-C-Phy- <i>Phycia tenella</i> HMAS110982             | 1     |
| 22 | FO-C-Phy- <i>Phycia tenella</i> HMAS110984             | 1     |
| 23 | FO-C-Phy- <i>Phycia thomsoniana</i>                    | 1     |
| 24 | FO-P-Coc- <i>Coccocarpia stellata</i> 1648_6790        | 1     |
| 25 | FO-P-Coc- <i>Coccocarpia stellata</i>                  | 1     |
| 26 | FO-P-Pan- <i>Pannaria rubiginosa</i> 2766              | 1     |
| 27 | FO-P-Pan- <i>Pannaria rubiginosa</i> 2355              | 1     |
| 28 | FO-P-Pan- <i>Pannaria rubiginosa</i> 2719              | 1     |
| 29 | FO-P-Pan- <i>Pannaria rubiginosa</i> 41024a_4802       | 1     |
| 30 | FO-L-Dao- <i>Daohugouthallus ciliiferus</i> -1         | 2     |
| 31 | FO-L-Dao- <i>Daohugouthallus ciliiferus</i> -2         | 2     |
| 32 | FO-L-Dao- <i>Daohugouthallus ciliiferus</i> -3         | 2     |
| 33 | FO-L-Dao- <i>Daohugouthallus ciliiferus</i> -4         | 2     |
| 34 | FO-L-Dao- <i>Daohugouthallus ciliiferus</i> -5         | 2     |
| 35 | FO-L-Dao- <i>Daohugouthallus ciliiferus</i> -B0476P -1 | 2     |
| 36 | FO-L-Dao- <i>Daohugouthallus ciliiferus</i> -B0476P    | 2     |

---

|    |                                                          |   |
|----|----------------------------------------------------------|---|
| 37 | FO-L- <i>Dao-Daohugouthallus ciliiferus</i> -NN2019001-1 | 2 |
| 38 | FO-L- <i>Dao-Daohugouthallus ciliiferus</i> -NN2019001-2 | 2 |
| 39 | FO-L- <i>Dao-Daohugouthallus ciliiferus</i> -NN2019001-3 | 2 |
| 40 | FO-L- <i>Dao-Daohugouthallus ciliiferus</i> -NN2019001-4 | 2 |
| 41 | FO-L- <i>Dao-Daohugouthallus ciliiferus</i> -NN2019001-5 | 2 |
| 42 | FO-L- <i>Dao-Daohugouthallus ciliiferus</i> -NN2019001-6 | 2 |
| 43 | FO-L- <i>Dao-Daohugouthallus ciliiferus</i> -NN2019001-7 | 2 |
| 44 | FO-L- <i>Dao-Daohugouthallus ciliiferus</i> -NN2019001-8 | 2 |
| 45 | FO-L- <i>Dao-Daohugouthallus ciliiferus</i> -new1-1      | 2 |
| 46 | FO-L- <i>Dao-Daohugouthallus ciliiferus</i> -new1-2      | 2 |
| 47 | FO-L- <i>Dao-Daohugouthallus ciliiferus</i> -new1-3      | 2 |
| 48 | FO-L- <i>Dao-Daohugouthallus ciliiferus</i> -new1-4      | 2 |
| 49 | FO-L- <i>Dao-Daohugouthallus ciliiferus</i> -new1-5      | 2 |
| 50 | FO-L- <i>Dao-Daohugouthallus ciliiferus</i> -new1-6      | 2 |
| 51 | FO-L- <i>Dao-Daohugouthallus ciliiferus</i> -new1-7      | 2 |
| 52 | FO-L- <i>Dao-Daohugouthallus ciliiferus</i> -new1-8      | 2 |
| 53 | FO-L- <i>Dao-Daohugouthallus ciliiferus</i> -new1-9      | 2 |
| 54 | FO-L- <i>Dao-Daohugouthallus ciliiferus</i> -new1-10     | 2 |
| 55 | FO-L-P-GZG BST 21949                                     | 3 |
| 56 | FO-L-Par- <i>Hypogymnia arcuata</i> -24855               | 3 |
| 57 | FO-L-Par- <i>Hypogymnia fragillima</i> -31157            | 3 |
| 58 | FO-L-Par- <i>Hypogymnia fragillima</i> -dor124_1         | 3 |
| 59 | FO-L-Par- <i>Hypogymnia physodes</i> HMAS81529           | 3 |
| 60 | FO-L-Par- <i>Hypogymnia physodes</i> -31296              | 3 |
| 61 | FO-L-Par- <i>Hypogymnia vittata</i> HMAS81350            | 3 |
| 62 | FO-L-Par- <i>Hypogymnia vittata</i> -25623               | 3 |
| 63 | FO-L-Par- <i>Hypotrachyna alectorialiorum</i> -1         | 3 |
| 64 | FO-L-Par- <i>Hypotrachyna alectorialiorum</i> -2         | 3 |
| 65 | FO-L-Par- <i>Hypotrachyna britannica</i>                 | 3 |
| 66 | FO-L-Par- <i>Hypotrachyna catawbiense</i> _1-1           | 3 |
| 67 | FO-L-Par- <i>Hypotrachyna catawbiense</i> _1-2           | 3 |
| 68 | FO-L-Par- <i>Hypotrachyna catawbiense</i> _1-3           | 3 |
| 69 | FO-L-Par- <i>Hypotrachyna cirrhatum</i> HMAS8295         | 3 |
| 70 | FO-L-Par- <i>Hypotrachyna cirrhatum</i> HMAS8319         | 3 |
| 71 | FO-L-Par- <i>Hypotrachyna cirrhatum</i> HMAS8322         | 3 |
| 72 | FO-L-Par- <i>Hypotrachyna cirrhatum</i> HMAS8339         | 3 |
| 73 | FO-L-Par- <i>Hypotrachyna cirrhatum</i> HMAS22474        | 3 |
| 74 | FO-L-Par- <i>Hypotrachyna cirrhatum</i> HMAS113576       | 3 |
| 75 | FO-L-Par- <i>Hypotrachyna cirrhatum</i> HMAS113576-1     | 3 |
| 76 | FO-L-Par- <i>Hypotrachyna croceopustulata</i>            | 3 |
| 77 | FO-L-Par- <i>Hypotrachyna croceopustulata</i> -1         | 3 |

---

---

|     |                                                            |   |
|-----|------------------------------------------------------------|---|
| 78  | FO-L-Par- <i>Hypotrachyna goiasii</i> -1                   | 3 |
| 79  | FO-L-Par- <i>Hypotrachyna goiasii</i> -2                   | 3 |
| 80  | FO-L-Par- <i>Hypotrachyna goiasii</i> -3                   | 3 |
| 81  | FO-L-Par- <i>Hypotrachyna nepalense</i> HMAS8085           | 3 |
| 82  | FO-L-Par- <i>Hypotrachyna rhizodendroideum</i> HMAS8269    | 3 |
| 83  | FO-L-Par- <i>Hypotrachyna rhizodendroideum</i> HMAS80658   | 3 |
| 84  | FO-L-Par- <i>Hypotrachyna sinuosa</i>                      | 3 |
| 85  | FO-L-Par- <i>Hypotrachyna sinuosa</i> -1                   | 3 |
| 86  | FO-L-Par- <i>Hypotrachyna vexans</i> -1                    | 3 |
| 87  | FO-P-Lob- <i>Lobaria anomala</i>                           | 4 |
| 88  | FO-P-Lob- <i>Lobaria anomala</i> _7                        | 4 |
| 89  | FO-P-Lob- <i>Lobaria hallii</i> _8                         | 4 |
| 90  | FO-P-Lob- <i>Lobaria kurokawae</i> -van-herk_web           | 4 |
| 91  | FO-P-Lob- <i>Lobaria kurokawae</i> -van-herk-1             | 4 |
| 92  | FO-P-Lob- <i>Lobaria linita</i> _4                         | 4 |
| 93  | FO-P-Lob- <i>Lobaria oregana</i> _9                        | 4 |
| 94  | FO-P-Lob- <i>Lobaria tenuis</i>                            | 4 |
| 95  | FO-P-Lob- <i>Sticta beauvoisii</i>                         | 4 |
| 96  | FO-P-Lob- <i>Sticta beauvoisii</i> _3_                     | 4 |
| 97  | FO-P-Lob- <i>Sticta limbata</i>                            | 4 |
| 98  | FO-P-Lob- <i>Sticta plumbicolor</i> -hawaii-3108279        | 4 |
| 99  | FO-P-Lob- <i>Sticta xanthotropa</i> -french-guiana-5914774 | 4 |
| 100 | FO-P-Pel- <i>Peltigera apthosa</i> _3                      | 4 |
| 101 | FO-P-Pel- <i>Peltigera castanea</i>                        | 4 |
| 102 | FO-P-Pel- <i>Peltigera collina</i>                         | 4 |
| 103 | FO-P-Pel- <i>Peltigera collina</i> -1                      | 4 |
| 104 | FO-P-Pel- <i>Peltigera collina</i> -2                      | 4 |
| 105 | FO-P-Pel- <i>Peltigera praetextata</i> HMAS13030           | 4 |
| 106 | FO-P-Pel- <i>Peltigera praetextata</i>                     | 4 |
| 107 | FO-P-Pel- <i>Peltigera rufescens</i> _cfr                  | 4 |
| 108 | FO-U-Umb- <i>Umbilicaria polyphylla</i> 41014_4736         | 4 |
| 109 | FO-U-Umb- <i>Umbilicaria polyphylla</i> 41014_4737         | 4 |
| 110 | FO-U-Umb- <i>Umbilicaria polyphylla</i> 41014_4738         | 4 |
| 111 | FO-U-Umb- <i>Umbilicaria polyphylla</i> 41014_4739         | 4 |
| 112 | FO-U-Umb- <i>Umbilicaria polyphylla</i> 41014_4743         | 4 |
| 113 | FR-L-Cla- <i>Cladonia amaurocraea</i> -1                   | 5 |
| 114 | FR-L-Cla- <i>Cladonia amaurocraea</i> -1-1                 | 5 |
| 115 | FR-L-Cla- <i>Cladonia arbuscula</i>                        | 5 |
| 116 | FR-L-Cla- <i>Cladonia furcata</i> HMAS7879                 | 5 |
| 117 | FR-L-Cla- <i>Cladonia furcata</i> HMAS7879-1               | 5 |
| 118 | FR-L-Cla- <i>Cladonia furcata</i> HMAS122801               | 5 |
| 119 | FR-L-Cla- <i>Cladonia furcata</i> HMAS122801-1             | 5 |

---

|     |                                                                       |   |
|-----|-----------------------------------------------------------------------|---|
| 120 | FR-L-Cla- <i>Cladonia furcata</i> -1                                  | 5 |
| 121 | FR-L-Cla- <i>Cladonia furcata</i> -1-1                                | 5 |
| 122 | FR-L-Cla- <i>Cladonia rangiferina</i> HMAS120346                      | 5 |
| 123 | FR-L-P-BitterfeldJörg Wunderlich Amber Collection F781                | 5 |
| 124 | FR-L-Par- <i>Evernia esorediosa</i> HMAS9403                          | 5 |
| 125 | FR-L-Par- <i>Evernia esorediosa</i> HMAS9405                          | 5 |
| 126 | FR-L-Ram- <i>Ramalina bajacalifornica</i> _Sharn_1557251388           | 5 |
| 127 | FR-L-Ram- <i>Ramalina calicaris</i> var. <i>fastigiata</i> FH00511819 | 5 |
| 128 | FR-L-Ram- <i>Ramalina camptospora</i> Nyl.                            | 5 |
| 129 | FR-L-Ram- <i>Ramalina culbersoniorum</i> _1550624964                  | 5 |
| 130 | FR-L-Ram- <i>Ramalina darwiniana</i> var. <i>darwiniana</i>           | 5 |
| 131 | FR-L-Ram- <i>Ramalina dilacerata</i> _2                               | 5 |
| 132 | FR-L-Ram- <i>Ramalina pacifica</i> Asahina                            | 5 |
| 133 | FR-L-Ram- <i>Ramalina pacifica</i> Asahina-1                          | 5 |
| 134 | FR-L-Sph- <i>Sphaerophorus globosus</i> -1                            | 5 |
| 135 | FR-P-Icm- <i>Siphula ceratites</i> _3                                 | 5 |
| 136 | FR-P-Icm- <i>Siphula pteruloides</i> 9412                             | 5 |
| 137 | FR-T-Tel- <i>Teloschistes flavicans</i> HMAS504                       | 5 |
| 138 | FR-T-Tel- <i>Teloschistes flavicans</i> HMAS547                       | 5 |
| 139 | FR-T-Tel- <i>Teloschistes flavicans</i> HMAS104536                    | 5 |

Notes: The photo name is listed as 'thallus growth type-the first letter of Order name-the first three letters of Family name-species name-specimen No. FO=Foliose, FR=fruticose.
